# Supplementary material for: Establishing a protocol for building a pan-Canadian population-based monitoring system for early childhood development for children with health disorders: Canadian Children’s Health in Context Study (CCHICS)
Source: PubMed Central journal article supplement — BMJ Open. 2018 May 29;8(5):e023688. doi: 10.1136/bmjopen-2018-023688 (PMC5988180; doi:10.1136/bmjopen-2018-023688), 2018-05-29
Supplement: bmjopen-2018-023688.draft_revisions.pdf [file bmjopen-2018-023688.draft_revisions.pdf]

# BMJ Open

BMJ Open is committed to open peer review. As part of this commitment we make the peer review history of every article we publish publicly available.

When an article is published we post the peer reviewers' comments and the authors' responses online. We also post the versions of the paper that were used during peer review. These are the versions that the peer review comments apply to.

The versions of the paper that follow are the versions that were submitted during the peer review process. They are not the versions of record or the final published versions. They should not be cited or distributed as the published version of this manuscript.

BMJ Open is an open access journal and the full, final, typeset and author-corrected version of record of the manuscript is available on our site with no access controls, subscription charges or pay-per-view fees (<http://bmjopen.bmj.com>).

If you have any questions on BMJ Open's open peer review process please email [info.bmjopen@bmj.com](mailto:info.bmjopen@bmj.com)

# BMJ Open

## Establishing a protocol for building a pan-Canadian population-based monitoring system for early childhood development for children with health disorders - Canadian Children's Health in Context Study (CCHICS)

|                               |                                                                                                                                                                                                                                                                                                                                                                                                                                                                                                                                                                                                                                                                                                                                                                                                                                                                                                                                                                                                                                                                                                                                                                                                                                                                                                                                                                                                                                                                                                                                                                                                                                                                                                                                                                                                                                                                             |
|-------------------------------|-----------------------------------------------------------------------------------------------------------------------------------------------------------------------------------------------------------------------------------------------------------------------------------------------------------------------------------------------------------------------------------------------------------------------------------------------------------------------------------------------------------------------------------------------------------------------------------------------------------------------------------------------------------------------------------------------------------------------------------------------------------------------------------------------------------------------------------------------------------------------------------------------------------------------------------------------------------------------------------------------------------------------------------------------------------------------------------------------------------------------------------------------------------------------------------------------------------------------------------------------------------------------------------------------------------------------------------------------------------------------------------------------------------------------------------------------------------------------------------------------------------------------------------------------------------------------------------------------------------------------------------------------------------------------------------------------------------------------------------------------------------------------------------------------------------------------------------------------------------------------------|
| Journal:                      | <i>BMJ Open</i>                                                                                                                                                                                                                                                                                                                                                                                                                                                                                                                                                                                                                                                                                                                                                                                                                                                                                                                                                                                                                                                                                                                                                                                                                                                                                                                                                                                                                                                                                                                                                                                                                                                                                                                                                                                                                                                             |
| Manuscript ID                 | bmjopen-2018-023688                                                                                                                                                                                                                                                                                                                                                                                                                                                                                                                                                                                                                                                                                                                                                                                                                                                                                                                                                                                                                                                                                                                                                                                                                                                                                                                                                                                                                                                                                                                                                                                                                                                                                                                                                                                                                                                         |
| Article Type:                 | Protocol                                                                                                                                                                                                                                                                                                                                                                                                                                                                                                                                                                                                                                                                                                                                                                                                                                                                                                                                                                                                                                                                                                                                                                                                                                                                                                                                                                                                                                                                                                                                                                                                                                                                                                                                                                                                                                                                    |
| Date Submitted by the Author: | 19-Apr-2018                                                                                                                                                                                                                                                                                                                                                                                                                                                                                                                                                                                                                                                                                                                                                                                                                                                                                                                                                                                                                                                                                                                                                                                                                                                                                                                                                                                                                                                                                                                                                                                                                                                                                                                                                                                                                                                                 |
| Complete List of Authors:     | <p>Janus, Magdalena; McMaster University, Offord Centre for Child Studies, Department of Psychiatry and Behavioural Neuroscience</p> <p>Brownell, Marni; University of Manitoba, Manitoba Centre for Health Policy, Department of Community Health Sciences</p> <p>Reid-Westoby, Caroline; McMaster University, Offord Centre for Child Studies, Department of Psychiatry and Behavioural Neuroscience</p> <p>Bennett, Teresa; McMaster University, Offord Centre for Child Studies, Department of Psychiatry and Behavioural Neuroscience</p> <p>Birken, Catherine; University of Toronto, Department of Pediatrics; The Hospital for Sick Children</p> <p>Coplan, Robert; Carleton University, Department of Psychology</p> <p>Duku, Eric; McMaster University, Offord Centre for Child Studies, Department of Psychiatry and Behavioural Neuroscience</p> <p>Ferro, Mark; University of Waterloo, School of Public Health and Health Systems</p> <p>Forer, Barry; University of British Columbia, Human Early Learning Partnership, School of Population and Public Health</p> <p>Georgiades, Stelios; McMaster University, Offord Centre for Child Studies, Department of Psychiatry and Behavioural Neuroscience</p> <p>Gorter, Jan Willem; McMaster University, CanChild Centre for Childhood Disability Research, Dep. of Pediatrics</p> <p>Guhn, Martin; University of British Columbia, Human Early Learning Partnership, School of Population and Public Health</p> <p>Maguire, Jonathan; University of Toronto, Department of Pediatrics; Li Ka Shing Knowledge Institute, St. Michael's Hospital</p> <p>Manson, Heather; Public Health Ontario, Health promotion, Chronic Disease and Injury Prevention</p> <p>Pei, Jacqueline; University of Alberta, Department of Educational Psychology</p> <p>Santos, Rob; Manitoba Government, Healthy Child Manitoba</p> |
| Keywords:                     | EPIDEMIOLOGY, Community child health < PAEDIATRICS, MENTAL HEALTH, PAEDIATRICS, Developmental neurology & neurodisability < PAEDIATRICS                                                                                                                                                                                                                                                                                                                                                                                                                                                                                                                                                                                                                                                                                                                                                                                                                                                                                                                                                                                                                                                                                                                                                                                                                                                                                                                                                                                                                                                                                                                                                                                                                                                                                                                                     |
|                               |                                                                                                                                                                                                                                                                                                                                                                                                                                                                                                                                                                                                                                                                                                                                                                                                                                                                                                                                                                                                                                                                                                                                                                                                                                                                                                                                                                                                                                                                                                                                                                                                                                                                                                                                                                                                                                                                             |

1  
2  
3  
4  
5  
6  
7  
8  
9  
10  
11  
12  
13  
14  
15  
16  
17  
18  
19  
20  
21  
22  
23  
24  
25  
26  
27  
28  
29  
30  
31  
32  
33  
34  
35  
36  
37  
38  
39  
40  
41  
42  
43  
44  
45  
46  
47  
48  
49  
50  
51  
52  
53  
54  
55  
56  
57  
58  
59  
60

SCHOLARONE™  
Manuscripts

For peer review only

1  
2  
3 **Establishing a protocol for building a pan-Canadian population-based monitoring system for early**  
4  
5 **childhood development for children with health disorders - Canadian Children's Health in Context**  
6  
7  
8 **Study (CCHICS)**  
9

10 **Authors:**

11 Magdalena Janus,<sup>1</sup> Marni Brownell,<sup>2</sup> Caroline Reid-Westoby,<sup>1</sup> Teresa Bennett,<sup>1</sup> Catherine Birken,<sup>3,4</sup>  
12 Robert Coplan,<sup>5</sup> Eric Duku,<sup>1</sup> Mark A. Ferro,<sup>6</sup> Barry Forer,<sup>7</sup> Stelios Georgiades,<sup>1</sup> Jan Willem Gorter,<sup>8,9</sup>  
13 Martin Guhn,<sup>7</sup> Jonathon L. Maguire,<sup>3,13</sup> Heather Manson,<sup>10</sup> Jacqueline Pei,<sup>11</sup> & Rob Santos<sup>12</sup>  
14  
15

16  
17 <sup>1</sup> Offord Centre for Child Studies, Department of Psychiatry and Behavioural Neuroscience, McMaster  
18 University, Hamilton, Ontario, Canada

19  
20 <sup>2</sup> Manitoba Centre for Health Policy, Department of Community Health Sciences, University of Manitoba,  
21 Winnipeg, Manitoba, Canada

22  
23 <sup>3</sup> Department of Pediatrics, University of Toronto, Toronto, Ontario, Canada

24  
25 <sup>4</sup> The Hospital for Sick Children, Toronto, Ontario, Canada

26  
27 <sup>5</sup> Department of Psychology, Carleton University, Ottawa, Ontario, Canada

28  
29 <sup>6</sup> School of Public Health and Health Systems, University of Waterloo, Waterloo, Ontario, Canada

30  
31 <sup>7</sup> Human Early Learning Partnership, School of Population and Public Health, University of British  
32 Columbia, Vancouver, British Columbia, Canada

33  
34 <sup>8</sup> Department of Pediatrics, McMaster University, Hamilton, Ontario, Canada

35  
36 <sup>9</sup> CanChild Centre for Childhood Disability Research, McMaster University, Hamilton, Ontario, Canada

37  
38 <sup>10</sup> Public Health Ontario, Toronto, Ontario, Canada

39  
40 <sup>11</sup> Department of Educational Psychology, University of Alberta, Edmonton, Alberta, Canada

41  
42 <sup>12</sup> Manitoba Education and Training, Healthy Child Manitoba, Government of Manitoba, Winnipeg,  
43 Manitoba, Canada

44  
45 <sup>13</sup> Li Ka Shing Knowledge Institute, St. Michael's Hospital, Toronto, Ontario, Canada

46 **Corresponding author:**

47 Magdalena Janus

48 Offord Centre for Child Studies, McMaster University

49 McMaster Innovation Park, 175 Longwood, Suite 201A

50 1280 Main St. West, Hamilton, ON L8S 4K1

51 T 905-525-9140 x 21418

52 E [janusm@mcmaster.ca](mailto:janusm@mcmaster.ca)

53  
54  
55 Text only word count: 4,002  
56  
57  
58  
59  
60

## Abstract

**Introduction:** Health disorders early in life have tremendous impact on children's developmental trajectories. Almost 80% of children with health disorders lack the developmental skills to take full advantage of school-based education relative to 27% of children without a health disorder. In Canada, there is currently a dearth of nationally representative data on the social determinants of early childhood development for children with health disorders. Evidence from Canada and other countries indicate that poorer developmental outcomes in typically-developing children are associated with lower socioeconomic status (SES). However, to date, it is not known whether this relationship is stronger among children with health disorders. The study's objectives are to estimate the prevalence and to investigate social determinants of developmental outcomes for young children with health disorders, using the Early Development Instrument (EDI).

**Methods and analysis:** Study objectives will be achieved through three steps. First, using existing (EDI) data for 10 provinces and 2 territories collected from 2004-2015, we will investigate differences in developmental health outcomes among children with identified health disorders. Second, population-level EDI data will be linked with neighbourhood sociodemographic census data to explore associations between socioeconomic characteristics and rates of specific diagnoses among 5- and 6-year-olds, including trends over time. Third, for 3 of these 12 regions, additional health and/or education databases will be linked at an individual level. These data will be used to establish differences in EDI outcomes in relation to the age-of-onset of diagnosis, and presence of intervention or treatment.

**Ethics and dissemination:** Study methodologies have been approved by the Hamilton Integrated Research Ethics Board (HiREB). The results of the analyses of developmental health outcomes for children with health disorders combined with SES will have implications for both health service delivery and school-based intervention strategies. Results will contribute to a framework for public policy.

1  
2  
3 **Keywords:** Epidemiology, community child health, mental health, paediatrics, developmental neurology  
4  
5 & neurodisability  
6  
7

### 8 **Strengths and limitations of this study** 9

- 10  
11 - CCHICS will use population-level pan-Canadian data to monitor the developmental health of  
12 over 990,502 children, of which 155,858 have a health disorder.  
13  
14  
15 - This study offers a broad overview of the developmental health vulnerabilities of children with  
16 health disorders across Canada, as well as over time, which allow for in-depth analyses of the  
17 social determinants of health.  
18  
19  
20 - Linkages at the individual level between child development data and health and/or education  
21 administrative data in 3 provinces will allow for the exploration of factors contributing to the  
22 association between developmental health outcomes and SES.  
23  
24  
25 - Asynchronous data collection cycles in provinces may be a limitation.  
26  
27  
28 - Health disorders may be subject to over- or under-reporting which may differ by type of  
29 disorder or place of residence, therefore limiting interpretation.  
30  
31  
32  
33  
34  
35  
36  
37  
38  
39  
40  
41  
42  
43  
44  
45  
46  
47  
48  
49  
50  
51  
52  
53  
54  
55  
56  
57  
58  
59  
60

## INTRODUCTION

### Early Childhood Trajectories

According to UNICEF, healthy development is a right for every child.[1] A *health disorder* i.e., a diagnosable medical condition early in life, has a tremendous impact on the developmental health trajectory of a child. Among otherwise healthy children, approximately one in four kindergartners (27%) lacks the developmental skills to take optimal advantage of school-based education.[2] Among children with identified special health needs at that age, this proportion rises to almost 80%. Having a health disorder in childhood often impacts trajectories of development throughout childhood, adolescence, and adulthood.[3] For instance, poor physical, mental, and socio-emotional development in childhood is linked to later school failure, unemployment, delinquency, and poor health in adulthood.[4, 5] Accordingly, providing additional support to children who are struggling can have protective effects that can set the child on a healthier trajectory,[4] provided we are able to identify those at risk. In environments rich with developmental opportunities and positive experiences, young children can flourish, regardless of their impairment, disease, or health condition.[6] Recent advances in understanding the developmental outcomes for children with health disorders indicate that difficulties are often confined to the areas of disability,[7] and, most importantly, that it is possible to experience a healthy developmental trajectory within a context of a health disorder.[8]

### Children's health and socioeconomic gradients

The constellations of conditions in which children are born and grow are often referred to as *social determinants of health*. [5, 9] Social determinants of health include, among other things, income, social status, education, social support networks, as well as social and physical environments.[9] It has long been recognized that socioeconomic status (SES), usually conceptualized as a combination of income, education, and employment indicators, is strongly related to health, with lower SES associated

1  
2  
3 with both higher mortality and morbidity.[10-13] While not synonymous with social determinants, SES is  
4 one of their strongest correlates.[5] The disparities in health across SES are referred to as the  
5  
6 *socioeconomic gradient*,[10] underscoring that difference in health outcomes is gradual and occurs  
7  
8 across the full spectrum of SES. That is, individuals living in poverty have poorer outcomes when  
9  
10 compared to those at the top of the SES hierarchy, but each increase in income is associated with an  
11  
12 increase in positive outcomes. The gradient in health status across SES has been well described across a  
13  
14 variety of conditions in both adult and child populations.[10, 14-16] Differences in SES at younger ages  
15  
16 are particularly important for setting lifetime health trajectories.[17]  
17  
18  
19  
20  
21

22         There is emerging evidence that low SES can negatively affect the speed of brain development.  
23  
24 [18, 19] In this regard, societal inequities are likely to exert a stronger impact on children with health  
25  
26 disorders than on those growing up without health disorders, henceforth referred to as “typically  
27  
28 developing”. Families of children with health disorders are also more likely to experience socio-  
29  
30 economic disadvantage.[6, 17, 20, 21] Combined with additional social or economic risks (e.g., single  
31  
32 parent family, low income), health disorders can significantly increase a child’s odds for later negative  
33  
34 outcomes.[22-24]  
35  
36  
37

38         SES gradient may affect children with health disorders differently than typically-developing  
39  
40 children.[25-32] Current research on children with health disorders has explored the association of SES  
41  
42 factors with prevalence or with outcomes (such as academic achievement or behaviour), but not both,  
43  
44 and usually for no more than one disorder/diagnosis at a time. This gap has been acknowledged,[33] in  
45  
46 particular in the emerging pediatric literature focusing on children with special health care needs,[34,  
47  
48 35] as it limits comparability, and thus implications for further research and policy. Research in three  
49  
50 Canadian provinces has shown that substantive differences in developmental health among typically-  
51  
52 developing children at school entry are tied to SES.[19, 36-38] Little is known about the underlying  
53  
54  
55  
56  
57  
58  
59  
60



mechanisms of this association at the neighbourhood level,[39] and even less about whether this relationship is similar for children with health disorders.

### Measuring Child Development at the Population Level

Until recently, Canada has lacked nationally representative data pertaining to social indicators of children's developmental health at school entry. Data collection initiatives implemented across most Canadian provinces and territories over the past decade have sought to address this gap, using the Early Development Instrument (EDI) to monitor trends in children's development across jurisdictions. The EDI is a teacher-completed checklist that measures children's developmental health at school entry in kindergarten in five domains: physical health and well-being, social competence, emotional maturity, language and cognitive development, and communication skills and general knowledge. It has been administered at the population level in most Canadian provinces and territories since 2004 (Table 1).[3, 40] EDI data are collected for each child individually and then aggregated at various levels to offer an assessment of developmental vulnerability in a given population. While the main purpose of the EDI is the assessment of child development, the questionnaire includes information on children's special needs, functional difficulties, and as of 2010, diagnoses. Participants with any of these comprise the sample of children with health disorders in the dataset. This approach reflects the non-categorical concept of illness.[41]

Table 1. *Canadian EDI Implementation Schedule from 2003/2004 to 2014/2015 with percentages and number of children with health disorders, as well as number of typically developing children for each implementation.*

|                  | AB                 | BC                   | MB                  | NB              | NL | NT | NS  | ON              | PEI | QC                 | SK                 | Y |
|------------------|--------------------|----------------------|---------------------|-----------------|----|----|-----|-----------------|-----|--------------------|--------------------|---|
| <b>2003/2004</b> |                    |                      |                     |                 |    |    |     | 13%             |     |                    |                    |   |
| <b>2004/2005</b> | 18%<br>434<br>2015 | 13%<br>4622<br>30747 | 13%<br>1080<br>7307 | 9%<br>61<br>617 |    |    |     | 15643<br>103260 |     | 14%<br>230<br>1390 | 14%<br>429<br>2644 |   |
| <b>2005/2006</b> |                    |                      | 18%                 | 16%             |    |    | 15% |                 |     | 14%                | 15%                |   |

|                  |                       |                      |                      |                    |                    |                   |                     |                        |                  |                       |                      |                  |
|------------------|-----------------------|----------------------|----------------------|--------------------|--------------------|-------------------|---------------------|------------------------|------------------|-----------------------|----------------------|------------------|
|                  |                       |                      | 2158<br>9513         | 125<br>659         |                    |                   | 229<br>1291         |                        |                  | 1548<br>9638          | 191<br>1089          |                  |
| <b>2006/2007</b> |                       |                      | 12%<br>1386<br>10128 | 10%<br>39<br>344   |                    |                   |                     |                        |                  | 19%<br>262<br>1132    | 14%<br>219<br>1319   |                  |
| <b>2007/2008</b> | 13%<br>24<br>167      | 13%<br>5016<br>32197 | 13%<br>179<br>1239   |                    | 11%<br>37<br>303   |                   | 17%<br>77<br>379    | 10%<br>11997<br>103955 | 8%<br>88<br>1002 | 20%<br>176<br>700     | 16%<br>254<br>1326   |                  |
| <b>2008/2009</b> |                       |                      | 12%<br>1368<br>10148 | 12%<br>849<br>6147 |                    |                   | 13%<br>605<br>4222  |                        |                  | 15%<br>369<br>2150    |                      |                  |
| <b>2009/2010</b> |                       | 19%<br>8942<br>37301 |                      |                    |                    |                   | 20%<br>147<br>599   |                        |                  |                       | 19%<br>4139<br>18181 | 26%<br>86<br>250 |
| <b>2010/2011</b> | 20%<br>14701<br>57980 |                      | 17%<br>2006<br>9813  |                    | 14%<br>156<br>932  |                   | 20%<br>460<br>1835  | 16%<br>19641<br>105102 |                  |                       |                      | 26%<br>90<br>250 |
| <b>2011/2012</b> |                       | 20%<br>8228<br>33805 |                      |                    | 16%<br>329<br>1760 | 24%<br>141<br>440 | 20%<br>448<br>1749  |                        |                  | 20%<br>12747<br>52242 | 16%<br>87<br>451     | 25%<br>89<br>273 |
| <b>2012/2013</b> |                       |                      | 16%<br>2071<br>10802 |                    | 14%<br>699<br>4134 | 23%<br>138<br>468 | 19%<br>1590<br>6804 |                        |                  |                       | 19%<br>1474<br>6469  | 24%<br>95<br>304 |
| <b>2013/2014</b> |                       | 17%<br>222<br>1055   |                      |                    | 16%<br>823<br>4237 | 23%<br>140<br>465 | 23%<br>314<br>1061  |                        |                  |                       |                      |                  |
| <b>2014/2015</b> |                       |                      | 16%<br>2106<br>11090 |                    |                    | 26%<br>153<br>442 | 19%<br>1582<br>6922 | 17%<br>22319<br>110400 |                  |                       |                      |                  |

Note. Light blue cells indicate a partial provincial collection. Dark blue cells indicate a full provincial collection; if the dark blue box spans multiple years it means a province or territory completed the implementation in waves.

A population-level database of developmental outcomes in kindergarten (as measured by the EDI) has recently been created in a CIHR-funded project, referred to as the *Canadian Neighbourhoods and Early Childhood Development (CanNECD) Study*.<sup>[42]</sup> The aim of the CanNECD Study was to establish a pan-Canadian database for monitoring children's developmental health and well-being.<sup>[35]</sup> This database merged pan-Canadian EDI data from 2004 to 2015, spanning 12 of the 13 Canadian provinces and territories, with the Canadian 2005 and 2010 Taxfiler data, as well as 2006 Census and 2011 National Household Survey data using children's postal codes.

1  
2  
3 The primary goal of the current study, named the Canadian Children's Health in Context Study  
4 (CCHICS), is to investigate the impact of different health disorders diagnosed prior to kindergarten and  
5 socioeconomic disadvantage on children's developmental outcomes at school entry. Analysis of these  
6 data will provide an opportunity to interpret and disseminate findings on developmental outcomes and  
7 socioeconomic gradients at regional and provincial levels for children with different health disorders.  
8  
9 CCHICS aims to establish the prevalence of health disorders and explore the social determinants of  
10 developmental outcomes for children with health disorders. CCHICS is guided by the following research  
11 questions:  
12  
13

- 14 1) For children diagnosed with health disorders, how do their developmental health outcomes,  
15 measured with the EDI in kindergarten, differ from those of typically-developing children, and do they  
16 vary depending on the type of disorder?  
17
- 18 2) What is the association between prevalence rates of various health disorders in kindergarten and  
19 neighbourhood-level SES? Does this association vary across jurisdictions (e.g., provinces, health  
20 regions)?  
21
- 22 3) What is the association between developmental outcomes as measured by the EDI and SES for  
23 children with health disorders? Is it the same as for children without health disorders?  
24
- 25 4) In three provinces with the capacity to link EDI to administrative health and education data at the  
26 individual level (Manitoba, British Columbia (BC), Ontario), what are the factors contributing to the  
27 association between EDI outcomes and SES?  
28  
29  
30  
31  
32  
33  
34  
35  
36  
37  
38  
39  
40  
41  
42  
43  
44  
45

## 46 **METHODS AND ANALYSIS**

### 47 **Data sources and variables**

48  
49  
50  
51  
52  
53  
54  
55  
56  
57  
58  
59  
60  
61  
62  
63  
64  
65  
66  
67  
68  
69  
70  
71  
72  
73  
74  
75  
76  
77  
78  
79  
80  
81  
82  
83  
84  
85  
86  
87  
88  
89  
90  
91  
92  
93  
94  
95  
96  
97  
98  
99  
100  
101  
102  
103  
104  
105  
106  
107  
108  
109  
110  
111  
112  
113  
114  
115  
116  
117  
118  
119  
120  
121  
122  
123  
124  
125  
126  
127  
128  
129  
130  
131  
132  
133  
134  
135  
136  
137  
138  
139  
140  
141  
142  
143  
144  
145  
146  
147  
148  
149  
150  
151  
152  
153  
154  
155  
156  
157  
158  
159  
160  
161  
162  
163  
164  
165  
166  
167  
168  
169  
170  
171  
172  
173  
174  
175  
176  
177  
178  
179  
180  
181  
182  
183  
184  
185  
186  
187  
188  
189  
190  
191  
192  
193  
194  
195  
196  
197  
198  
199  
200  
201  
202  
203  
204  
205  
206  
207  
208  
209  
210  
211  
212  
213  
214  
215  
216  
217  
218  
219  
220  
221  
222  
223  
224  
225  
226  
227  
228  
229  
230  
231  
232  
233  
234  
235  
236  
237  
238  
239  
240  
241  
242  
243  
244  
245  
246  
247  
248  
249  
250  
251  
252  
253  
254  
255  
256  
257  
258  
259  
260  
261  
262  
263  
264  
265  
266  
267  
268  
269  
270  
271  
272  
273  
274  
275  
276  
277  
278  
279  
280  
281  
282  
283  
284  
285  
286  
287  
288  
289  
290  
291  
292  
293  
294  
295  
296  
297  
298  
299  
300  
301  
302  
303  
304  
305  
306  
307  
308  
309  
310  
311  
312  
313  
314  
315  
316  
317  
318  
319  
320  
321  
322  
323  
324  
325  
326  
327  
328  
329  
330  
331  
332  
333  
334  
335  
336  
337  
338  
339  
340  
341  
342  
343  
344  
345  
346  
347  
348  
349  
350  
351  
352  
353  
354  
355  
356  
357  
358  
359  
360  
361  
362  
363  
364  
365  
366  
367  
368  
369  
370  
371  
372  
373  
374  
375  
376  
377  
378  
379  
380  
381  
382  
383  
384  
385  
386  
387  
388  
389  
390  
391  
392  
393  
394  
395  
396  
397  
398  
399  
400  
401  
402  
403  
404  
405  
406  
407  
408  
409  
410  
411  
412  
413  
414  
415  
416  
417  
418  
419  
420  
421  
422  
423  
424  
425  
426  
427  
428  
429  
430  
431  
432  
433  
434  
435  
436  
437  
438  
439  
440  
441  
442  
443  
444  
445  
446  
447  
448  
449  
450  
451  
452  
453  
454  
455  
456  
457  
458  
459  
460  
461  
462  
463  
464  
465  
466  
467  
468  
469  
470  
471  
472  
473  
474  
475  
476  
477  
478  
479  
480  
481  
482  
483  
484  
485  
486  
487  
488  
489  
490  
491  
492  
493  
494  
495  
496  
497  
498  
499  
500  
501  
502  
503  
504  
505  
506  
507  
508  
509  
510  
511  
512  
513  
514  
515  
516  
517  
518  
519  
520  
521  
522  
523  
524  
525  
526  
527  
528  
529  
530  
531  
532  
533  
534  
535  
536  
537  
538  
539  
540  
541  
542  
543  
544  
545  
546  
547  
548  
549  
550  
551  
552  
553  
554  
555  
556  
557  
558  
559  
560  
561  
562  
563  
564  
565  
566  
567  
568  
569  
570  
571  
572  
573  
574  
575  
576  
577  
578  
579  
580  
581  
582  
583  
584  
585  
586  
587  
588  
589  
590  
591  
592  
593  
594  
595  
596  
597  
598  
599  
600  
601  
602  
603  
604  
605  
606  
607  
608  
609  
610  
611  
612  
613  
614  
615  
616  
617  
618  
619  
620  
621  
622  
623  
624  
625  
626  
627  
628  
629  
630  
631  
632  
633  
634  
635  
636  
637  
638  
639  
640  
641  
642  
643  
644  
645  
646  
647  
648  
649  
650  
651  
652  
653  
654  
655  
656  
657  
658  
659  
660  
661  
662  
663  
664  
665  
666  
667  
668  
669  
670  
671  
672  
673  
674  
675  
676  
677  
678  
679  
680  
681  
682  
683  
684  
685  
686  
687  
688  
689  
690  
691  
692  
693  
694  
695  
696  
697  
698  
699  
700  
701  
702  
703  
704  
705  
706  
707  
708  
709  
710  
711  
712  
713  
714  
715  
716  
717  
718  
719  
720  
721  
722  
723  
724  
725  
726  
727  
728  
729  
730  
731  
732  
733  
734  
735  
736  
737  
738  
739  
740  
741  
742  
743  
744  
745  
746  
747  
748  
749  
750  
751  
752  
753  
754  
755  
756  
757  
758  
759  
760  
761  
762  
763  
764  
765  
766  
767  
768  
769  
770  
771  
772  
773  
774  
775  
776  
777  
778  
779  
780  
781  
782  
783  
784  
785  
786  
787  
788  
789  
790  
791  
792  
793  
794  
795  
796  
797  
798  
799  
800  
801  
802  
803  
804  
805  
806  
807  
808  
809  
810  
811  
812  
813  
814  
815  
816  
817  
818  
819  
820  
821  
822  
823  
824  
825  
826  
827  
828  
829  
830  
831  
832  
833  
834  
835  
836  
837  
838  
839  
840  
841  
842  
843  
844  
845  
846  
847  
848  
849  
850  
851  
852  
853  
854  
855  
856  
857  
858  
859  
860  
861  
862  
863  
864  
865  
866  
867  
868  
869  
870  
871  
872  
873  
874  
875  
876  
877  
878  
879  
880  
881  
882  
883  
884  
885  
886  
887  
888  
889  
890  
891  
892  
893  
894  
895  
896  
897  
898  
899  
900  
901  
902  
903  
904  
905  
906  
907  
908  
909  
910  
911  
912  
913  
914  
915  
916  
917  
918  
919  
920  
921  
922  
923  
924  
925  
926  
927  
928  
929  
930  
931  
932  
933  
934  
935  
936  
937  
938  
939  
940  
941  
942  
943  
944  
945  
946  
947  
948  
949  
950  
951  
952  
953  
954  
955  
956  
957  
958  
959  
960  
961  
962  
963  
964  
965  
966  
967  
968  
969  
970  
971  
972  
973  
974  
975  
976  
977  
978  
979  
980  
981  
982  
983  
984  
985  
986  
987  
988  
989  
990  
991  
992  
993  
994  
995  
996  
997  
998  
999  
1000

The EDI is a measure of developmental health of kindergarten-age children, implemented at population levels in most jurisdictions in Canada.[3] It is a 103-item, teacher-completed survey of five domains of children's development: physical health and well-being; social competence; emotional maturity; language and cognitive development; and communication skills and general knowledge, further broken down into 16 subdomains (Table 2). Variables relevant to the research objectives are: age, sex, special needs status, functional impairments, a specific diagnosis, if any, and the mean scores for each (sub)domain. After receiving training, kindergarten teachers complete the EDI in the second half of the school year. The psychometric properties of the EDI have been extensively validated.[3, 43-45] The EDI is a reliable and cost-efficient method of assessing developmental health outcomes at the developmentally critical period of transition to school and has moderate to high predictive validity for later school achievement.[46, 47] The EDI is completed for each individual student and the results are aggregated to a group level (according to geographic or demographic criteria) for interpretation. The most common aggregations are at the neighbourhood, school district, and province/territory levels. The Offord Centre for Child Studies (OCCS), at McMaster University, is the national repository of the anonymized EDI data.

Table 2. *Domains and subdomains of the EDI*

| <b>Domains</b>                 | <b>Subdomains</b>                                                                                                         |
|--------------------------------|---------------------------------------------------------------------------------------------------------------------------|
| Physical health and well-being | Physical readiness for the school day<br>Physical independence<br>Gross and fine motor skills                             |
| Social competence              | Overall social competence<br>Responsibility and respect<br>Approaches to learning<br>Readiness to explore new things      |
| Emotional maturity             | Prosocial and helping behaviour<br>Anxious and fearful behaviour<br>Aggressive behaviour<br>Hyperactivity and inattention |

|                                            |                                                                                                   |
|--------------------------------------------|---------------------------------------------------------------------------------------------------|
| Language and cognitive development         | Basic literacy<br>Interest in literacy/numeracy and memory<br>Advanced literacy<br>Basic numeracy |
| Communication skills and general knowledge | Communication skills and general knowledge                                                        |

*Derived measures. Health disorders.* On the EDI, teachers report up to three diagnosed health conditions or impairments, based on information from a parent or health professional (Table 3). The first diagnosis listed is considered the “primary” one for statistical purposes. Teachers report on whether a child has a limitation that interferes with their ability to function in the classroom, with 11 categories provided (Table 4), and whether or not he/she has a special need. *Developmental health.* Mean scores for each of the five EDI domains, and for the 16 EDI subdomains will be used. Vulnerability on each domain, i.e., a score below the 10th percentile based on the population sample of over 160,000 Canadian kindergarten children, will also be used, in addition to *overall vulnerability* (0 = not vulnerable, 1 = vulnerable), which represents vulnerability in at least one of the five domains.[48] For each aggregate unit of analysis (e.g., neighbourhood, school district), child-level data are aggregated to represent the “percentage of vulnerable children” overall, and in a domain, for the given unit of analysis.

Table 3. *Diagnoses included on the EDI.*

| DIAGNOSIS                                                                                                                                 | CODE |
|-------------------------------------------------------------------------------------------------------------------------------------------|------|
| <b><i>Mental Health</i></b>                                                                                                               |      |
| ADHD                                                                                                                                      | 1    |
| Anxiety                                                                                                                                   | 2    |
| Depression                                                                                                                                | 3    |
| Oppositional Defiant Disorder/Conduct Disorder                                                                                            | 4    |
| Other Mental Health Disorders                                                                                                             | 5    |
| <b><i>Developmental Disabilities</i></b>                                                                                                  |      |
| Autism Spectrum Disorder (ASD – includes Autism, Asperger Syndrome, & Pervasive Developmental Disorder [PDD-NOS] not otherwise specified) | 6    |
| Developmentally Delayed/Global Delay                                                                                                      | 7    |
| Down Syndrome/Other Genetic Developmental Disability                                                                                      | 8    |
| Fetal Alcohol Spectrum Disorder (FASD) or Alcohol-Related Neurodevelopmental Disorder (ARND)                                              | 9    |
| Intellectual Delay (Mild or Moderate)                                                                                                     | 10   |
| Rett’s Disorder, Childhood Disintegrative Disorder [CDD]                                                                                  | 11   |
| Learning disorders (reading, writing, math)                                                                                               | 12   |
| <b><i>Speech and Language Disorders</i></b>                                                                                               |      |

|    |                                       |    |
|----|---------------------------------------|----|
| 1  |                                       |    |
| 2  |                                       |    |
| 3  | Apraxia                               | 13 |
| 4  | Cleft Palate/Lip                      | 14 |
| 5  | Receptive or Expressive Language      | 15 |
| 6  | Selective Mutism                      | 16 |
| 7  | Other Speech & Language Disorders     | 17 |
| 8  | <b>Sensory Disorders</b>              |    |
| 9  | Blind/ Visually Impaired              | 18 |
| 10 | Deaf/Hard of Hearing                  | 19 |
| 11 | Other Sensory                         | 20 |
| 12 | <b>Motor Disorders</b>                |    |
| 13 | Cerebral Palsy                        | 21 |
| 14 | Mitochondrial disease                 | 22 |
| 15 | Muscular Dystrophies                  | 23 |
| 16 | Spina Bifida                          | 24 |
| 17 | Other Motor Impairment                | 25 |
| 18 | <b>Other</b>                          |    |
| 19 | Acquired Brain Injury                 | 26 |
| 20 | Asthma                                | 27 |
| 21 | Cancer/ Leukemia/Brain Tumour         | 28 |
| 22 | Cystic Fibrosis (CF)                  | 29 |
| 23 | Diabetes                              | 30 |
| 24 | Epilepsy/Seizures                     | 31 |
| 25 | Heart Problems/Stroke                 | 32 |
| 26 | Juvenile Rheumatoid Arthritis         | 33 |
| 27 | Obesity                               | 34 |
| 28 | Phenylketonuria (PKU)/Other Metabolic | 35 |
| 29 | Tourette Syndrome                     | 36 |
| 30 | Other, not listed                     | 37 |
| 31 |                                       |    |
| 32 |                                       |    |
| 33 |                                       |    |
| 34 |                                       |    |
| 35 |                                       |    |
| 36 |                                       |    |
| 37 |                                       |    |
| 38 |                                       |    |
| 39 |                                       |    |
| 40 |                                       |    |
| 41 |                                       |    |
| 42 |                                       |    |
| 43 |                                       |    |
| 44 |                                       |    |
| 45 |                                       |    |
| 46 |                                       |    |
| 47 |                                       |    |
| 48 |                                       |    |
| 49 |                                       |    |
| 50 |                                       |    |
| 51 |                                       |    |
| 52 |                                       |    |
| 53 |                                       |    |
| 54 |                                       |    |
| 55 |                                       |    |
| 56 |                                       |    |
| 57 |                                       |    |
| 58 |                                       |    |
| 59 |                                       |    |
| 60 |                                       |    |

Table 4. *Functional impairments included on the EDI.*

|    |                                                                                                   |
|----|---------------------------------------------------------------------------------------------------|
| 36 |                                                                                                   |
| 37 | <b>Does this child have a problem that influences his/her ability to function in a classroom?</b> |
| 38 | a. Physical disability                                                                            |
| 39 | b. Visual impairment                                                                              |
| 40 | c. Hearing impairment                                                                             |
| 41 | d. Speech impairment                                                                              |
| 42 | e. Learning disability                                                                            |
| 43 | f. Emotional problem                                                                              |
| 44 | g. Behavioural problem                                                                            |
| 45 | h. Home environment/problems at home                                                              |
| 46 | i. Chronic medical/health problems                                                                |
| 47 | j. Unaddressed dental needs                                                                       |
| 48 | k. Other                                                                                          |
| 49 |                                                                                                   |
| 50 |                                                                                                   |
| 51 |                                                                                                   |
| 52 |                                                                                                   |
| 53 |                                                                                                   |
| 54 |                                                                                                   |
| 55 |                                                                                                   |
| 56 |                                                                                                   |
| 57 |                                                                                                   |
| 58 |                                                                                                   |
| 59 |                                                                                                   |
| 60 |                                                                                                   |

1  
2  
3 The EDI database contains data for over 990,502 kindergarten children, of whom 155,858  
4  
5 (15.7%) have either an identified special need (yes/no), a functional impairment (out of 11), or a  
6  
7 diagnosis (up to 3 out of a possible 37; see Table 3) of a health disorder. The newly-developed linkage  
8  
9 between EDI and databases containing neighbourhood-level socio-demographic variables offers an  
10  
11 opportunity to investigate the degree of impact of socioeconomic disadvantage on children with health  
12  
13 disorders. Furthermore, the linking of the individual records from the EDI–SES databases with existing  
14  
15 health and educational administrative databases in three out of the 12 jurisdictions will allow us to  
16  
17 replicate and validate, on a subsample, the robustness of the patterns found for population-level data,  
18  
19 by including health diagnoses occurring after kindergarten, treatment and service data, and individual-  
20  
21 level indicators of SES.  
22  
23

#### 24 Neighbourhood-level socio-economic status

25  
26  
27  
28 The measures of neighbourhood-level SES applied in this study are based on the methodology  
29  
30 established for the CanNECD Study.[42] Socio-economic and demographic information will come from  
31  
32 the 2006 Canadian Census and 2011 National Household Survey, as well as the 2005 and 2010 Taxfiler  
33  
34 data. Geographic regions have been established for the CanNECD Study. The criteria and boundaries  
35  
36 maintain existing geographical, social, and neighbourhood boundaries, where possible.[42]  
37  
38  
39

40  
41 The traditional conceptualizations of SES usually rely on indicators of income, education, and  
42  
43 occupation, and these will be used in our models, following the establishment of a new SES index for the  
44  
45 CanNECD study.[49] Building on the methodology in the CanNECD Study,[42] additional SES and  
46  
47 demographic indicators will be used in the analyses, including measures of wealth, poverty, lone  
48  
49 parenthood, unemployment, residential dwelling/type of housing, residential stability, occupation,  
50  
51 education, immigration, and language diversity.  
52  
53

#### 54 Individual-level health/education data linkages

1  
2  
3 For three provinces, provincial EDI datasets will be linked with other population-wide databases  
4  
5 at the individual level. Different combinations of data sources (e.g. health, education) will be used to  
6  
7 cross-validate different health disorders in childhood (i.e. examine the concordance of diagnosis from  
8  
9 EDI and administrative datasets) and to examine children's developmental trajectories after  
10  
11 kindergarten.[50, 51] 1) Manitoba: The Manitoba Centre for Health Policy (MCHP) houses the  
12  
13 Population Research Data Repository, a collection of de-identified administrative, survey, clinical, and  
14  
15 registry databases for the entire province. 2) British Columbia: Population Data BC (PopDataBC) houses  
16  
17 provincial administrative databases from the Ministries that hold data relevant to this study (Health and  
18  
19 Education); and 3) Ontario: The Education and Accountability Office (EQAO) database contains standard  
20  
21 grade tests and children's special education needs, and the Institute for Clinical and Evaluative Science  
22  
23 (ICES) data holdings include information on variables similar to Manitoba and BC. These data will be  
24  
25 linked with individual-level EDI data.  
26  
27  
28  
29

### 30 **Patient and public involvement**

31  
32  
33 The project's methodology is based on a secondary data analysis, therefore we did not involve  
34  
35 patients or the public in the development of the research questions. Notwithstanding, considering the  
36  
37 relevance of the study to public health, policy-makers and advisors are members of our team.  
38  
39

### 40 **Data access and security**

41  
42  
43 The CCHICS database will be hosted on a secure network at the OCCS at McMaster University in  
44  
45 Hamilton, Ontario, Canada. A secure platform is a crucial tool for creating accessibility to the database  
46  
47 by other interested researchers and thus increasing the opportunities for future linkages and knowledge  
48  
49 mobilization. We are committed to expand the utilization of the databases we create, therefore,  
50  
51 researchers wishing to gain access to the CCHICS database are invited to submit a short application  
52  
53 outlining the researcher's background and providing a brief description of the proposed project. Upon  
54  
55  
56  
57



1  
2  
3 approval, the anonymized, neighbourhood-aggregated dataset can be downloaded from a secure server  
4  
5 at the OCCS.  
6  
7

8           The individual-level linkages in Manitoba will occur at MCHP and analyses will be conducted by  
9  
10 one of their analysts. CCHICS researchers will only receive results and will not have access to the linked  
11  
12 data. As for the linkages in BC and Ontario, the various establishments will link and de-identify the data  
13  
14 before providing access to the local CCHICS investigators.  
15  
16

### 17 18 **Analysis plan**

19  
20           The planned analyses are designed to address each of the research questions outlined above.  
21  
22 The statistical analyses will take place once the databases have been prepared (EDI/SES) or access  
23  
24 approved (individual-level databases). Building on the methods developed for the CanNECD Study, we  
25  
26 will statistically model the additive and multiplicative associations between the SES and demographic  
27  
28 variables and developmental outcomes for children with health disorders. Results of these analyses will  
29  
30 be particularly valuable for research dissemination and knowledge translation purposes for specific  
31  
32 regions, and within different health disorder subpopulations, as they will allow, for the first time, the  
33  
34 ability to explore SES-related factors that are associated with positive development outcomes for  
35  
36 children with health disorders.  
37  
38  
39  
40

#### 41           *Research Question 1. Developmental outcomes in kindergarten for children with health disorders.*

42  
43 The health information reported on the EDI will be used to create several groups. First, the *typically-*  
44  
45 *developing* reference group will be identified, comprising children without any diagnosed health  
46  
47 disorders, special needs, or functional impairments. Second, the *health disorder* group will be identified  
48  
49 as children with any diagnosed health disorder, special needs, or functional impairments. This group  
50  
51 will be further subdivided into those with specific disorders (e.g. autism spectrum disorder (ASD),  
52  
53 attention deficit hyperactivity disorder (ADHD), cerebral palsy (CP), etc.) and categories of disorders (e.g.  
54  
55  
56  
57  
58  
59  
60

1  
2  
3 mental health, developmental delay, speech and language, etc.). Where possible with administrative  
4 databases, the conditions will be categorized using the International Statistical Classification of Diseases  
5 and Related Health Problems 10<sup>th</sup> Revision (ICD-10).  
6  
7  
8  
9

10 The analyses will focus on EDI scores at the domain- and subdomain-level as outcomes.  
11  
12 Diagnostic subgroups of children with specific disorders (e.g. ASD, ADHD, CP, etc.) will be compared with  
13 the reference group and then with each of the other groups (i.e. ASD compared to ADHD, and so forth).  
14  
15 We will also compare children with only a diagnosis to those with a diagnosis and either a second  
16 diagnosis, a special needs designation, teacher-reported functional concerns, or all of the above.  
17  
18  
19  
20  
21

22 *Research Question 2. Association of the prevalence of health disorders and SES.* Our analyses aim  
23 to identify the combinations of SES factors that are most strongly associated with the prevalence of  
24 health disorders for: 1) the pan-Canadian context, 2) different regions (i.e. provincial, health regions,  
25 neighbourhoods), and 3) with various subpopulations and health groups (e.g. boys compared to girls,  
26 ASD vs other developmental disorders, single vs. co-morbid disorders, etc.). The association between  
27 the identified SES factors and prevalence (overall prevalence and prevalence of specific disorders) will  
28 be tested for main and interaction effects, after controlling for the child-level variables (gender, age,  
29 English-as-a-Second-Language) available from the EDI. The first model to be tested will be that of the  
30 selected SES variables and the prevalence of health disorders. Next, the multiplicative associations of  
31 the SES variables will be added to the model. Finally, child-level variables and geographic-unit variables  
32 will be added to the model as covariates at the different levels of clustering. These analyses will be  
33 performed for each province/territory in the study.  
34  
35  
36  
37  
38  
39  
40  
41  
42  
43  
44  
45  
46  
47  
48  
49

50 *Research Question 3. Child developmental outcomes and SES indices.* We will statistically model  
51 associations between the SES composite indicators and developmental health outcomes using EDI  
52 vulnerability rates for each of the five domains, as well as overall vulnerability rates, for children with  
53  
54  
55  
56  
57

1  
2  
3 health disorders in order to replicate the findings for typically developing children. The relationship  
4 between the SES index variables identified in the CanNECD Study and the EDI mean scores for children  
5 with health disorders will also be examined,[42] and the most strongly correlated neighbourhood-level  
6 SES index variables will be used as neighbourhood-level covariates. The relationship between the SES  
7 variables and each of the outcomes will be tested for main and interaction effects. These analyses will  
8 be repeated for each jurisdiction and each disorder with an adequate sample size.  
9

10  
11  
12  
13  
14  
15  
16 *Research Question 4. Case study provinces: Impact of timing of diagnosis and presence of*  
17 *comorbidities on the association between outcomes and SES.* For three provinces (BC, Manitoba, and  
18 Ontario), children's EDI data will be linked at an individual-level with administrative health and  
19 education databases which include diagnostic information and age-of-onset of first diagnosis. These  
20 data will be used to search for unique behaviour functioning characteristics, measured by the EDI,  
21 among children who were, for the respective disorders, first diagnosed at a relatively younger or older  
22 age, and those with co-morbidities (i.e., for children with more than one disorder). The availability of  
23 individual-level measures of poverty in BC and Manitoba will also allow us to determine whether the  
24 patterns observed using area-level measures of SES are replicated at the individual level.[37] As with  
25 Research Question 3, we will statistically test the main and interaction effects between SES factors and  
26 EDI overall vulnerability rates, including the interaction between SES and age of diagnosis, and  
27 (separately) the interaction between SES and the existence of co-morbidities.  
28  
29  
30  
31  
32  
33  
34  
35  
36  
37  
38  
39  
40  
41  
42  
43

#### 44 **Ethics and dissemination**

45  
46  
47 CCHICS has been approved by the Hamilton Integrated Research Ethics Board (HiREB) and the  
48 University of Manitoba Health Research Ethics Board. Participant confidentiality is protected as the EDI,  
49 Census, and Taxfiler data for this study are aggregated to the neighbourhood level and hosted in a  
50 secure database system.  
51  
52  
53  
54  
55  
56  
57

1  
2  
3 The team of investigators maximizes the relevance of the findings to different communities of  
4 practice (academic, clinical, education, and policy) and the reach to diverse health-oriented groups.  
5  
6 Currently, results from each EDI implementation are disseminated to participating communities and  
7  
8 school districts and have been incorporated by governments and agencies as an indicator of children's  
9  
10 health and well-being.[52, 53] We have a large network of collaborators from other universities and  
11  
12 jurisdictions, whose interests intersect with our program and may, at an appropriate time, join the team  
13  
14 of investigators. Relationships are already well established with many study stakeholders (e.g., clinicians  
15  
16 and educators) through various relationships of the investigators. This will facilitate mobilization of the  
17  
18 knowledge generated through this research and translate it to various audiences (e.g., clinicians,  
19  
20 educators, policy-makers, researchers, community groups, and parents) through four major  
21  
22 mechanisms: practitioner/community networks, education and knowledge dissemination networks,  
23  
24 policy-makers, and data accessibility.  
25  
26  
27  
28  
29

### 30 **DISCUSSION**

31  
32  
33 Few data sources provide the opportunity to researchers to examine the combined association  
34  
35 between early childhood health disorder and socioeconomic in relation to children's early  
36  
37 developmental outcomes. CCHICS is a novel approach to do so at a pan-Canadian population level. As  
38  
39 such, it will generate new knowledge, which will contribute to the science of child development, and will  
40  
41 be of immediate use and application in community contexts. The sociodemographic neighbourhood  
42  
43 factors associated with the prevalence of particular disorders that we expect to find will support public  
44  
45 health community efforts to improve access and integration of early identification services in  
46  
47 neighbourhoods. The integrated knowledge base resulting from this project will establish: 1) a  
48  
49 population-based prevalence of health disorders by jurisdiction, thus allowing future monitoring of  
50  
51 health and developmental trajectories of children with these disorders; 2) the extent to which  
52  
53 socioeconomic disadvantage affects developmental outcomes for children with health disorders; 3) the  
54  
55  
56  
57  
58  
59  
60

1  
2  
3 degree of impact of SES on child development for different types of health disorders; and 4) the factors  
4 that contribute to the mechanism of association between SES and development that can contribute to  
5 our understanding of interventions and supports for children with health disorders.  
6  
7  
8

9  
10 In this study our goal is to identify SES and social factors, if any, that contribute to 'unfair and  
11 unnecessary inequities' in children's developmental health outcomes for those with health disorders.[5]  
12 Identifying these inequities is the first step towards developing strategies to flatten the socioeconomic  
13 gradients.[5] By flattening these gradients, we can improve the overall health status of children, so that  
14 society can move toward the goal of achieving *equity from the start*. Our research will allow us to  
15 compare social gradients across jurisdictions, health disorder subgroups, and groups with associated  
16 functional impairments. Our Pan-Canadian data allow for comparisons that would be otherwise  
17 impossible due to small frequencies of specific health disorders in any given jurisdiction, and if each  
18 province or territory had their own, incommensurable indicator of developmental health outcome.  
19 Moreover, population-level data, and specifically EDI data, have guided action and progress toward  
20 improving early childhood development in Canada and Australia,[54, 55] and have transformed early  
21 childhood systems in parts of the United States.[56] Our methodology and findings will have instant  
22 relevance to research in these countries, as well as others that use EDI data on a regular basis.  
23  
24  
25  
26  
27  
28  
29  
30  
31  
32  
33  
34  
35  
36  
37  
38  
39

40 This approach of examining children with health disorders will also help contribute new  
41 knowledge and make meaningful differences at a policy level, as well as for children in the classroom.  
42 Despite scattered evidence of educational and health sectors adopting policies reflecting the growing  
43 knowledge about actions that will assist in optimizing developmental outcomes (e.g., introduction of  
44 full-day learning in Ontario and BC, enhanced billing codes for the 18-month well-baby visit in Ontario),  
45 provincial policy innovation is inconsistent across Canada, and there is no federal policy framework for  
46 the early years. The results of our study, with their direct relevance to early identification and detection  
47  
48  
49  
50  
51  
52  
53  
54  
55  
56  
57  
58  
59  
60

1  
2  
3 policies, both in the health and education sectors, have a high potential for a direct impact on policies  
4  
5 supporting optimal development for children with health disorders.  
6  
7

## 8 **Limitations**

9

10  
11 Despite many advantages (such as geographic breadth and sample size), our study has  
12  
13 limitations. With the exception of the administrative databases in Manitoba, BC, and Ontario, the  
14  
15 diagnostic information is based on parent information, not on administrative diagnostic codes. Health  
16  
17 disorders may be subject to over- or under-reporting which may differ by type of disorder or even place  
18  
19 of residence. These limitations will be addressed by exploring concordance between EDI and health  
20  
21 databases in Manitoba, BC, and Ontario. However, until data are available to researchers in the  
22  
23 remaining provinces, these limitations cannot be easily overcome in population-based studies. Another  
24  
25 potential limitation is the small number of cases of certain disorders which may limit the analyses  
26  
27 possible by the SES indicators, and by the five EDI domains and 16 sub-domains; aggregation of  
28  
29 measures may be necessary in these cases. In addition, our definition of 'primary' diagnosis as the first  
30  
31 listed disorder is somewhat arbitrary and may require additional sensitivity analyses. Finally, it is  
32  
33 important to note that while this study uses the neighbourhood-level SES to examine the impact of  
34  
35 sociodemographic factors on child development, it does not commit the ecological fallacy as it does not  
36  
37 make inferences about the individual children's SES based on neighbourhood SES.  
38  
39  
40  
41

## 42 **Conclusion**

43

44  
45 CCHICS offers an important opportunity to investigate developmental outcomes in children at  
46  
47 risk that are not commonly included or available in sufficient numbers in sample-based research on  
48  
49 children with health problems. This study also provides a unique and timely opportunity to utilize  
50  
51 existing resources and methods to monitor the prevalence of health disorders at a population level.  
52  
53  
54 Establishing the pattern of the SES gradient is needed for designing early interventions, for policy-level  
55  
56  
57  
58  
59  
60

1  
2  
3 decision-making regarding the type and location of services, and for understanding the necessary  
4  
5 conditions for optimal developmental trajectories of children with health disorders.  
6  
7  
8  
9

10  
11 **Authors' Contributions:** The study was conceived by MJ and MB, who are the co-principal investigators  
12  
13 on the original funded grant proposal. All authors contributed to writing of the proposal, the protocol  
14  
15 paper, or both, and are participating in the interpretation of findings and the drafting of manuscripts.  
16  
17

18  
19 **Funding statement:** This work was supported by an operating grant from the Canadian Institutes of  
20  
21 Health Research, grant number 142416. Dr. Janus is supported by the Ontario Chair in Early Childhood  
22  
23 Development. Dr. Bennett is supported by a Hamilton Health Sciences Early Career Award. Dr. Ferro is  
24  
25 supported by a hold the Canada Research Chair in Youth Mental Health.  
26  
27

28  
29 **Competing interests statement:** The authors do not have any competing interests.  
30

31  
32 **Acknowledgements:** We would like to thank all the teachers for their diligence and enthusiasm in  
33  
34 completing the EDI questionnaires, and Sarah Taylor and Molly Pottruff for their assistance with the  
35  
36 protocol paper.  
37  
38  
39  
40  
41  
42  
43  
44  
45  
46  
47  
48  
49  
50  
51  
52  
53  
54  
55  
56  
57  
58  
59  
60

## References

1. UNICEF, *Convention on the Rights of Children*. 1989.
2. Offord Centre for Child Studies, *Summary Report: Senior Kindergarten Students in the province of Ontario*. 2017, McMaster University: Hamilton, Ontario.
3. Janus, M. and D.R. Offord, *Development and psychometric properties of the Early Development Instrument (EDI): A measure of children's school readiness*. Canadian Journal of Behavioural Science / Revue canadienne des sciences du comportement, 2007. **39**(1): p. 1-22.
4. Currie, J., *Health Disparities and Gaps in School Readiness*. The Future of Children, 2005. **15**(1): p. 117-38.
5. Commission on Social Determinants of Health, *Closing the gap in a generation: health equity through action on the social determinants of health. Final Report of the Commission on Social Determinants of Health*. 2008, World Health Organization: Geneva, Switzerland.
6. Fawcett, G. and P. Roberts, *Young children with disabilities in Canada*. 2003, Ottawa, ON: Human Resources Development Canada and Health Canada.
7. Janus, M., *Impact of impairment on children with special needs at school entry: Comparison of school readiness outcomes in Canada, Australia, and Mexico*. Exceptionality Education International, 2011. **21**(2-3): p. 29-44.
8. Gorter, J.W., et al., *Pathways toward positive psychosocial outcomes and mental health for youth with disabilities: A knowledge synthesis of developmental trajectories*. Canadian Journal of Community Mental Health, 2014. **33**(1): p. 45-61.
9. Public Health Agency of Canada. *Social Determinants of Health*. 2016 [cited 2018 February 23].
10. Marmot, M.G., et al., *Health inequalities among British civil servants: the Whitehall II study*. Lancet, 1991. **337**(8754): p. 1387-93.



- 1  
2  
3 11. Adler, N.E., et al., *Socioeconomic inequalities in health. No easy solution*. JAMA, 1993. **269**(24):  
4 p. 3140-5.  
5  
6
- 7 12. Marmot, M.G., M. Kogevinas, and M.A. Elston, *Social/economic status and disease*. Annu Rev  
8 Public Health, 1987. **8**: p. 111-35.  
9
- 10 13. Syme, S.L. and L.F. Berkman, *Social class, susceptibility and sickness*. Am J Epidemiol, 1976.  
11  
12 **104**(1): p. 1-8.  
13  
14
- 15 14. Adler, N.E., et al., *Socioeconomic status and health. The challenge of the gradient*. Am Psychol,  
16  
17 1994. **49**(1): p. 15-24.  
18  
19
- 20 15. Hertzman, C., *The biological embedding of early experience and its effects on health in*  
21  
22 *adulthood*. Ann N Y Acad Sci, 1999. **896**: p. 85-95.  
23  
24
- 25 16. Roberts, I. and C. Power, *Does the decline in child injury mortality vary by social class? A*  
26  
27 *comparison of class specific mortality in 1981 and 1991*. BMJ, 1996. **313**(7060): p. 784-6.  
28  
29
- 30 17. Chen, E., A.D. Martin, and K.A. Matthews, *Trajectories of socioeconomic status across children's*  
31  
32 *lifetime predict health*. Pediatrics, 2007. **120**(2): p. e297-303.  
33  
34
- 35 18. Hackman, D.A. and M.J. Farah, *Socioeconomic status and the developing brain*. Trends Cogn Sci,  
36  
37 2009. **13**(2): p. 65-73.  
38
- 39 19. Hanson, J.L., et al., *Family poverty affects the rate of human infant brain growth*. PLoS One,  
40  
41 2013. **8**(12): p. e0080954.  
42
- 43 20. Msall, M.E., et al., *Distressed neighborhoods and child disability rates: analyses of 157,000*  
44  
45 *school-age children*. Dev Med Child Neurol, 2007. **49**(11): p. 814-7.  
46  
47
- 48 21. Janus, M. and E. Duku, *The school entry gap: Socioeconomic, family, and health factors*  
49  
50 *associated with children's school readiness to learn*. Early Education and Development, 2007.  
51  
52 **18**(3): p. 375-403.  
53  
54  
55  
56  
57  
58  
59  
60

- 1  
2  
3 22. Jirikowic, T., D. Kartin, and H.C. Olson, *Children with fetal alcohol spectrum disorders: A*  
4 *descriptive profile of adaptive function*. Canadian Journal of Occupational Therapy / Revue  
5 *Canadienne D'Ergotherapie*, 2008. **75**(4): p. 238-48.  
6  
7  
8  
9  
10 23. Liptak, G.S., et al., *Health status of children with moderate to severe cerebral palsy*. Dev Med  
11 *Child Neurol*, 2001. **43**(6): p. 364-70.  
12  
13  
14 24. Streissguth, A.P., et al., *Risk factors for adverse life outcomes in fetal alcohol syndrome and fetal*  
15 *alcohol effects*. J Dev Behav Pediatr, 2004. **25**(4): p. 228-38.  
16  
17  
18  
19 25. Statistics Canada, *Participation and Activity Limitation Survey 2006: Families of Children with*  
20 *Disabilities in Canada*. 2008, Ministry of Industry: Ottawa, ON.  
21  
22  
23 26. Kierstead, A.G. and L. Harvey, *Special education in Canada*. Perception, 2001. **25**(2): p. 10-12.  
24  
25  
26 27. Bethell, C., et al., *Factors promoting or potentially impeding school success: Disparities and state*  
27 *variations for children with special health care needs*. Maternal and Child Health Journal, 2012.  
28  
29 **16**(Suppl 1): p. S35-43.  
30  
31  
32 28. McManus, B.M., et al., *Social determinants of state variation in special education participation*  
33 *among preschoolers with developmental delays and disabilities*. Health Place, 2011. **17**(2): p.  
34  
35 681-90.  
36  
37  
38  
39 29. Janus, M., *The Early Development Instrument: A Tool for Monitoring Children's Development and*  
40 *Readiness for School*, in *Early Child Development - From Measurement to Action*, M.E. Young and  
41 L.M. Richardson, Editors. 2007, World Bank: Washington, D.C. p. 141-155.  
42  
43  
44  
45 30. Cohen, E., et al., *Residential movement patterns of families of young children with chronic*  
46 *conditions in Ontario, Canada: a population-based cohort study*. Int J Equity Health, 2013. **12**: p.  
47  
48 62.  
49  
50  
51  
52 31. Calman, R.C. and P.J. Crawford, *Starting Early: Teaching Learning and Assessment*. 2013, EQAO  
53 *Research: Toronto, ON*.  
54  
55  
56  
57  
58  
59  
60

- 1  
2  
3 32. Hillemeier, M.M., et al., *Measuring early childhood health and health disparities: a new*  
4 *approach*. *Matern Child Health J*, 2013. **17**(10): p. 1852-61.  
5  
6  
7 33. Bethell, C.D., et al., *What is the prevalence of children with special health care needs? Toward an*  
8 *understanding of variations in findings and methods across three national surveys*. *Matern Child*  
9 *Health J*, 2008. **12**(1): p. 1-14.  
10  
11  
12 34. Newacheck, P.W., et al., *An epidemiologic profile of children with special health care needs*.  
13 *Pediatrics*, 1998. **102**(1.1): p. 117-23.  
14  
15  
16 35. van Dyck, P.C., et al., *Prevalence and characteristics of children with special health care needs*.  
17 *Arch Pediatr Adolesc Med*, 2004. **158**(9): p. 884-90.  
18  
19  
20 36. Kershaw, P., et al., *The British Columbia atlas of child development*. 2005, Human Learning  
21 *Partnership*: Vancouver, BC.  
22  
23 37. Santos, R., et al., *The Early Development Instrument (EDI) in Manitoba: Linking Socioeconomic*  
24 *Adversity and Biological Vulnerability at Birth to Children's Outcomes at Age 5*. 2012, Manitoba  
25 *Centre for Health Policy*: Winnipeg, MB.  
26  
27  
28 38. Duku, E., et al. *The relationship between both individual and composite socioeconomic indicators*  
29 *and healthy child development in Ontario*. in *Society for Research in Child Development*. 2013.  
30 *Seattle, Washington*.  
31  
32  
33 39. Minh, A., et al., *A review of neighborhood effects and early child development: How, where, and*  
34 *for whom, do neighborhoods matter?* *Health Place*, 2017. **46**: p. 155-174.  
35  
36  
37 40. Janus, M., et al., *The Early Development Instrument: A population-based measure for*  
38 *communities. A handbook on development, properties, and use*. 2007, *Offord Centre for Child*  
39 *Studies*: Hamilton, ON.  
40  
41  
42 41. Jessop, D.J. and R.E.K. Stein, *A Noncategorical Approach to Psychosocial Research*. *Journal of*  
43 *Psychosocial Oncology*, 1993. **1**(4): p. 61-64.  
44  
45  
46  
47  
48  
49  
50  
51  
52  
53  
54  
55  
56  
57  
58  
59  
60

- 1  
2  
3 42. Guhn, M., et al., *Examining the social determinants of children's developmental health: protocol*  
4 *for building a pan-Canadian population-based monitoring system for early childhood*  
5 *development*. *BMJ Open*, 2016. **6**(4): p. 1-9.  
6  
7  
8  
9  
10 43. Forer, B. and B.D. Zumbo, *Validation of multilevel constructs: Validation methods and empirical*  
11 *findings for the EDI*. *Social Indicators Research*, 2011. **103**(2): p. 231-265.  
12  
13  
14 44. Guhn, M., A. Gadermann, and B.D. Zumbo, *Does the EDI measure school readiness in the same*  
15 *way across different groups of children?* *Early Education and Development*, 2007. **18**(3): p. 453-  
16 472.  
17  
18  
19  
20  
21 45. Guhn, M., et al., *Validation theory and research for a population-level measure of children's*  
22 *development, wellbeing, and school readiness*. *Social Indicators Research*, 2011. **103**(2): p. 183-  
23 191.  
24  
25  
26  
27  
28 46. Forget-Dubois, N., et al., *Predicting early school achievement with the EDI: A longitudinal*  
29 *population-based study*. *Early Education and Development*, 2007. **18**(3): p. 405-426.  
30  
31  
32 47. Lloyd, J.E.V. and C. Hertzman, *From kindergarten readiness to fourth-grade assessment:*  
33 *Longitudinal analysis with linked population data*. *Social Science & Medicine*, 2009. **68**(1): p.  
34 111-123.  
35  
36  
37  
38  
39 48. Davies, S., et al., *Using the Early Development Instrument to examine cognitive and non-*  
40 *cognitive school readiness and elementary student achievement*. *Early Childhood Research*  
41 *Quarterly*, 2016: p. 63-75.  
42  
43  
44  
45 49. Forer, B., et al., *Canadian Neighbourhoods and Early Child Development (CanNECD) SES Index*. in  
46 preparation.  
47  
48  
49  
50 50. Kozyrskyj, A.L., C.A. Mustard, and A.B. Becker, *Identifying children with persistent asthma from*  
51 *health care administrative records*. *Can Respir J*, 2004. **11**(2): p. 141-5.  
52  
53  
54  
55  
56  
57  
58  
59  
60

- 1  
2  
3 51. Brownell, M., et al., *Manitoba Child Health Atlas Update*. 2008, Manitoba Centre for Health  
4 Policy: Winnipeg, MB.  
5  
6  
7 52. *Pan-Canadian Health Inequalities Data Tool, 2017 Edition*. A joint initiative of the Public Health  
8 Agency of Canada, the Pan-Canadian Public Health Network, Statistics Canada and the Canadian  
9 Institute of Health Information 2017 [cited 2018 April 13].  
10  
11  
12  
13  
14 53. Canadian Institute for Health Information. *Children Vulnerable in Areas of Early Development*.  
15 2016 [cited 2018 April 13].  
16  
17  
18 54. Janus, M., *Early Development Instrument: "From results to action survey" report*. 2013,  
19 McMaster University, Offord Centre for Child Studies: Hamilton, ON.  
20  
21  
22  
23 55. Sayers, M., et al., *Building better communities for children: Community implementation and*  
24 *evaluation of the Australian Early Development Index*. Early Education and Development, 2007.  
25  
26  
27 **18(3): p. 519-534.**  
28  
29  
30 56. Halfon, N. *Using the EDI for transforming early childhood community systems*. in *First 5*  
31 *California and Water Cooler Joint Conference*. 2011. Sacramento, CA.  
32  
33  
34  
35  
36  
37  
38  
39  
40  
41  
42  
43  
44  
45  
46  
47  
48  
49  
50  
51  
52  
53  
54  
55  
56  
57  
58  
59  
60

**STROBE 2007 (v4) Statement—Checklist of items that should be included in reports of *cross-sectional studies***

**Title of manuscript: Establishing a protocol for building a pan-Canadian population-based monitoring system for early childhood development for children with health disorders - Canadian Children's Health in Context Study (CCHICS)**

| Section/Topic             | Item # | Recommendation                                                                                                                                                                       | Reported on page # |
|---------------------------|--------|--------------------------------------------------------------------------------------------------------------------------------------------------------------------------------------|--------------------|
| <b>Title and abstract</b> | 1      | (a) Indicate the study's design with a commonly used term in the title or the abstract                                                                                               | 1                  |
|                           |        | (b) Provide in the abstract an informative and balanced summary of what was done and what was found                                                                                  | 1                  |
| <b>Introduction</b>       |        |                                                                                                                                                                                      |                    |
| Background/rationale      | 2      | Explain the scientific background and rationale for the investigation being reported                                                                                                 | 3-5                |
| Objectives                | 3      | State specific objectives, including any prespecified hypotheses                                                                                                                     | 7                  |
| <b>Methods</b>            |        |                                                                                                                                                                                      |                    |
| Study design              | 4      | Present key elements of study design early in the paper                                                                                                                              | 1, 11              |
| Setting                   | 5      | Describe the setting, locations, and relevant dates, including periods of recruitment, exposure, follow-up, and data collection                                                      | 1, 6, 7            |
| Participants              | 6      | (a) Give the eligibility criteria, and the sources and methods of selection of participants                                                                                          | 11                 |
| Variables                 | 7      | Clearly define all outcomes, exposures, predictors, potential confounders, and effect modifiers. Give diagnostic criteria, if applicable                                             | 13-15              |
| Data sources/measurement  | 8*     | For each variable of interest, give sources of data and details of methods of assessment (measurement). Describe comparability of assessment methods if there is more than one group | 8-12               |
| Bias                      | 9      | Describe any efforts to address potential sources of bias                                                                                                                            | N/A                |
| Study size                | 10     | Explain how the study size was arrived at                                                                                                                                            | 11                 |
| Quantitative variables    | 11     | Explain how quantitative variables were handled in the analyses. If applicable, describe which groupings were chosen and why                                                         | 13-15              |
| Statistical methods       | 12     | (a) Describe all statistical methods, including those used to control for confounding                                                                                                | 13                 |
|                           |        | (b) Describe any methods used to examine subgroups and interactions                                                                                                                  | 13                 |
|                           |        | (c) Explain how missing data were addressed                                                                                                                                          | N/A                |

|                          |     |                                                                                                                                                                                                              |                    |
|--------------------------|-----|--------------------------------------------------------------------------------------------------------------------------------------------------------------------------------------------------------------|--------------------|
|                          |     | (d) If applicable, describe analytical methods taking account of sampling strategy                                                                                                                           | N/A                |
|                          |     | (e) Describe any sensitivity analyses                                                                                                                                                                        | N/A                |
| <b>Results</b>           |     |                                                                                                                                                                                                              |                    |
| Participants             | 13* | (a) Report numbers of individuals at each stage of study—eg numbers potentially eligible, examined for eligibility, confirmed eligible, included in the study, completing follow-up, and analysed            | N/A                |
|                          |     | (b) Give reasons for non-participation at each stage                                                                                                                                                         | N/A                |
|                          |     | (c) Consider use of a flow diagram                                                                                                                                                                           | N/A                |
| Descriptive data         | 14* | (a) Give characteristics of study participants (eg demographic, clinical, social) and information on exposures and potential confounders                                                                     | N/A                |
|                          |     | (b) Indicate number of participants with missing data for each variable of interest                                                                                                                          | N/A                |
| Outcome data             | 15* | Report numbers of outcome events or summary measures                                                                                                                                                         | N/A                |
| Main results             | 16  | (a) Give unadjusted estimates and, if applicable, confounder-adjusted estimates and their precision (eg, 95% confidence interval). Make clear which confounders were adjusted for and why they were included | N/A                |
|                          |     | (b) Report category boundaries when continuous variables were categorized                                                                                                                                    | N/A                |
|                          |     | (c) If relevant, consider translating estimates of relative risk into absolute risk for a meaningful time period                                                                                             | N/A                |
| Other analyses           | 17  | Report other analyses done—eg analyses of subgroups and interactions, and sensitivity analyses                                                                                                               | N/A                |
| <b>Discussion</b>        |     |                                                                                                                                                                                                              |                    |
| Key results              | 18  | Summarise key results with reference to study objectives                                                                                                                                                     | N/A                |
| Limitations              | 19  | Discuss limitations of the study, taking into account sources of potential bias or imprecision. Discuss both direction and magnitude of any potential bias                                                   | 17, 18             |
| Interpretation           | 20  | Give a cautious overall interpretation of results considering objectives, limitations, multiplicity of analyses, results from similar studies, and other relevant evidence                                   | 16-18              |
| Generalisability         | 21  | Discuss the generalisability (external validity) of the study results                                                                                                                                        | N/A                |
| <b>Other information</b> |     |                                                                                                                                                                                                              |                    |
| Funding                  | 22  | Give the source of funding and the role of the funders for the present study and, if applicable, for the original study on which the present article is based                                                | Cover letter, p. 6 |

\*Give information separately for cases and controls in case-control studies and, if applicable, for exposed and unexposed groups in cohort and cross-sectional studies.

1  
2  
3  
4 **Note:** An Explanation and Elaboration article discusses each checklist item and gives methodological background and published examples of transparent reporting. The STROBE  
5 checklist is best used in conjunction with this article (freely available on the Web sites of PLoS Medicine at <http://www.plosmedicine.org/>, Annals of Internal Medicine at  
6 <http://www.annals.org/>, and Epidemiology at <http://www.epidem.com/>). Information on the STROBE Initiative is available at [www.strobe-statement.org](http://www.strobe-statement.org).  
7  
8  
9  
10  
11  
12  
13  
14  
15  
16  
17  
18  
19  
20  
21  
22  
23  
24  
25  
26  
27  
28  
29  
30  
31  
32  
33  
34  
35  
36  
37  
38  
39  
40  
41  
42  
43  
44  
45  
46  
47

For peer review only



# BMJ Open

## Establishing a protocol for building a pan-Canadian population-based monitoring system for early childhood development for children with health disorders - Canadian Children's Health in Context Study (CCHICS)

|                                 |                                                                                                                                                                                                                                                                                                                                                                                                                                                                                                                                                                                                                                                                                                                                                                                                                                                                                                                                                                                                                                                                                                                                                                                                                                                                                                                                                                                                                                                                                                                                                                                                                                                                                                                                                                                                          |
|---------------------------------|----------------------------------------------------------------------------------------------------------------------------------------------------------------------------------------------------------------------------------------------------------------------------------------------------------------------------------------------------------------------------------------------------------------------------------------------------------------------------------------------------------------------------------------------------------------------------------------------------------------------------------------------------------------------------------------------------------------------------------------------------------------------------------------------------------------------------------------------------------------------------------------------------------------------------------------------------------------------------------------------------------------------------------------------------------------------------------------------------------------------------------------------------------------------------------------------------------------------------------------------------------------------------------------------------------------------------------------------------------------------------------------------------------------------------------------------------------------------------------------------------------------------------------------------------------------------------------------------------------------------------------------------------------------------------------------------------------------------------------------------------------------------------------------------------------|
| Journal:                        | <i>BMJ Open</i>                                                                                                                                                                                                                                                                                                                                                                                                                                                                                                                                                                                                                                                                                                                                                                                                                                                                                                                                                                                                                                                                                                                                                                                                                                                                                                                                                                                                                                                                                                                                                                                                                                                                                                                                                                                          |
| Manuscript ID                   | bmjopen-2018-023688.R1                                                                                                                                                                                                                                                                                                                                                                                                                                                                                                                                                                                                                                                                                                                                                                                                                                                                                                                                                                                                                                                                                                                                                                                                                                                                                                                                                                                                                                                                                                                                                                                                                                                                                                                                                                                   |
| Article Type:                   | Protocol                                                                                                                                                                                                                                                                                                                                                                                                                                                                                                                                                                                                                                                                                                                                                                                                                                                                                                                                                                                                                                                                                                                                                                                                                                                                                                                                                                                                                                                                                                                                                                                                                                                                                                                                                                                                 |
| Date Submitted by the Author:   | 26-Apr-2018                                                                                                                                                                                                                                                                                                                                                                                                                                                                                                                                                                                                                                                                                                                                                                                                                                                                                                                                                                                                                                                                                                                                                                                                                                                                                                                                                                                                                                                                                                                                                                                                                                                                                                                                                                                              |
| Complete List of Authors:       | Janus, Magdalena; McMaster University, Offord Centre for Child Studies, Department of Psychiatry and Behavioural Neuroscience<br>Brownell, Marni; University of Manitoba, Manitoba Centre for Health Policy, Department of Community Health Sciences<br>Reid-Westoby, Caroline; McMaster University, Offord Centre for Child Studies, Department of Psychiatry and Behavioural Neuroscience<br>Bennett, Teresa; McMaster University, Offord Centre for Child Studies, Department of Psychiatry and Behavioural Neuroscience<br>Birken, Catherine; University of Toronto, Department of Pediatrics; The Hospital for Sick Children<br>Coplan, Robert; Carleton University, Department of Psychology<br>Duku, Eric; McMaster University, Offord Centre for Child Studies, Department of Psychiatry and Behavioural Neuroscience<br>Ferro, Mark; University of Waterloo, School of Public Health and Health Systems<br>Forer, Barry; University of British Columbia, Human Early Learning Partnership, School of Population and Public Health<br>Georgiades, Stelios; McMaster University, Offord Centre for Child Studies, Department of Psychiatry and Behavioural Neuroscience<br>Gorter, Jan Willem; McMaster University, CanChild Centre for Childhood Disability Research, Dep. of Pediatrics<br>Guhn, Martin; University of British Columbia, Human Early Learning Partnership, School of Population and Public Health<br>Maguire, Jonathan; University of Toronto, Department of Pediatrics; Li Ka Shing Knowledge Institute, St. Michael's Hospital<br>Manson, Heather; Public Health Ontario, Health promotion, Chronic Disease and Injury Prevention<br>Pei, Jacqueline; University of Alberta, Department of Educational Psychology<br>Santos, Rob; Manitoba Government, Healthy Child Manitoba |
| <b>Primary Subject Heading</b>: | Epidemiology                                                                                                                                                                                                                                                                                                                                                                                                                                                                                                                                                                                                                                                                                                                                                                                                                                                                                                                                                                                                                                                                                                                                                                                                                                                                                                                                                                                                                                                                                                                                                                                                                                                                                                                                                                                             |
| Secondary Subject Heading:      | Paediatrics, Public health                                                                                                                                                                                                                                                                                                                                                                                                                                                                                                                                                                                                                                                                                                                                                                                                                                                                                                                                                                                                                                                                                                                                                                                                                                                                                                                                                                                                                                                                                                                                                                                                                                                                                                                                                                               |
| Keywords:                       | EPIDEMIOLGY, Community child health < PAEDIATRICES, MENTAL HEALTH, PAEDIATRICES, Developmental neurology & neurodisability < PAEDIATRICES                                                                                                                                                                                                                                                                                                                                                                                                                                                                                                                                                                                                                                                                                                                                                                                                                                                                                                                                                                                                                                                                                                                                                                                                                                                                                                                                                                                                                                                                                                                                                                                                                                                                |

1  
2  
3  
4  
5  
6  
7  
8  
9  
10  
11  
12  
13  
14  
15  
16  
17  
18  
19  
20  
21  
22  
23  
24  
25  
26  
27  
28  
29  
30  
31  
32  
33  
34  
35  
36  
37  
38  
39  
40  
41  
42  
43  
44  
45  
46  
47  
48  
49  
50  
51  
52  
53  
54  
55  
56  
57  
58  
59  
60

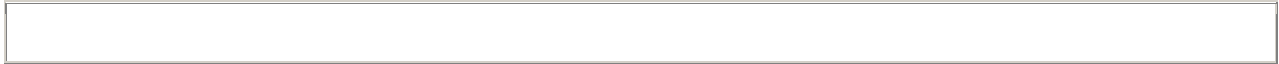

SCHOLARONE™  
Manuscripts

For peer review only

1  
2  
3 **Establishing a protocol for building a pan-Canadian population-based monitoring system for early**  
4  
5 **childhood development for children with health disorders - Canadian Children's Health in Context**  
6  
7  
8 **Study (CCHICS)**  
9

10 **Authors:**

11 Magdalena Janus,<sup>1</sup> Marni Brownell,<sup>2</sup> Caroline Reid-Westoby,<sup>1</sup> Teresa Bennett,<sup>1</sup> Catherine Birken,<sup>3,4</sup>  
12 Robert Coplan,<sup>5</sup> Eric Duku,<sup>1</sup> Mark A. Ferro,<sup>6</sup> Barry Forer,<sup>7</sup> Stelios Georgiades,<sup>1</sup> Jan Willem Gorter,<sup>8,9</sup>  
13 Martin Guhn,<sup>7</sup> Jonathon L. Maguire,<sup>3,13</sup> Heather Manson,<sup>10</sup> Jacqueline Pei,<sup>11</sup> & Rob Santos<sup>12</sup>  
14  
15

16  
17 <sup>1</sup> Offord Centre for Child Studies, Department of Psychiatry and Behavioural Neuroscience, McMaster  
18 University, Hamilton, Ontario, Canada

19  
20 <sup>2</sup> Manitoba Centre for Health Policy, Department of Community Health Sciences, University of Manitoba,  
21 Winnipeg, Manitoba, Canada

22  
23 <sup>3</sup> Department of Pediatrics, University of Toronto, Toronto, Ontario, Canada

24  
25 <sup>4</sup> The Hospital for Sick Children, Toronto, Ontario, Canada

26  
27 <sup>5</sup> Department of Psychology, Carleton University, Ottawa, Ontario, Canada

28  
29 <sup>6</sup> School of Public Health and Health Systems, University of Waterloo, Waterloo, Ontario, Canada

30  
31 <sup>7</sup> Human Early Learning Partnership, School of Population and Public Health, University of British  
32 Columbia, Vancouver, British Columbia, Canada

33  
34 <sup>8</sup> Department of Pediatrics, McMaster University, Hamilton, Ontario, Canada

35  
36 <sup>9</sup> CanChild Centre for Childhood Disability Research, McMaster University, Hamilton, Ontario, Canada

37  
38 <sup>10</sup> Public Health Ontario, Toronto, Ontario, Canada

39  
40 <sup>11</sup> Department of Educational Psychology, University of Alberta, Edmonton, Alberta, Canada

41  
42 <sup>12</sup> Manitoba Education and Training, Healthy Child Manitoba, Government of Manitoba, Winnipeg,  
43 Manitoba, Canada

44  
45 <sup>13</sup> Li Ka Shing Knowledge Institute, St. Michael's Hospital, Toronto, Ontario, Canada

46 **Corresponding author:**

47 Magdalena Janus

48 Offord Centre for Child Studies, McMaster University

49 McMaster Innovation Park, 175 Longwood, Suite 201A

50 1280 Main St. West, Hamilton, ON L8S 4K1

51 T 905-525-9140 x 21418

52 E [janusm@mcmaster.ca](mailto:janusm@mcmaster.ca)

53  
54  
55 Text only word count: 4,002  
56  
57  
58  
59  
60

## Abstract

**Introduction:** Health disorders early in life have tremendous impact on children's developmental trajectories. Almost 80% of children with health disorders lack the developmental skills to take full advantage of school-based education relative to 27% of children without a health disorder. In Canada, there is currently a dearth of nationally representative data on the social determinants of early childhood development for children with health disorders. Evidence from Canada and other countries indicate that poorer developmental outcomes in typically-developing children are associated with lower socioeconomic status (SES). However, to date, it is not known whether this relationship is stronger among children with health disorders. The study's objectives are to estimate the prevalence and to investigate social determinants of developmental outcomes for young children with health disorders, using the Early Development Instrument (EDI).

**Methods and analysis:** Study objectives will be achieved through three steps. First, using existing (EDI data for 10 provinces and 2 territories collected from 2004-2015, we will investigate differences in developmental health outcomes among children with identified health disorders. Second, population-level EDI data will be linked with neighbourhood sociodemographic census data to explore associations between socioeconomic characteristics and rates of specific diagnoses among 5- and 6-year-olds, including trends over time. Third, for 3 of these 12 regions, additional health and/or education databases will be linked at an individual level. These data will be used to establish differences in EDI outcomes in relation to the age-of-onset of diagnosis, and presence of intervention or treatment.

**Ethics and dissemination:** Study methodologies have been approved by the Hamilton Integrated Research Ethics Board (HiREB). The results of the analyses of developmental health outcomes for children with health disorders combined with SES will have implications for both health service delivery and school-based intervention strategies. Results will contribute to a framework for public policy.

1  
2  
3 **Keywords:** Epidemiology, community child health, mental health, paediatrics, developmental neurology  
4  
5 & neurodisability  
6  
7

### 8 **Strengths and limitations of this study**

9

- 10
- 11 - CCHICS will use population-level pan-Canadian data to monitor the developmental health of  
12 over 990,502 children, of which 155,858 have a health disorder.  
13
  - 14 - This study offers a broad overview of the developmental health vulnerabilities of children with  
15 health disorders across Canada, as well as over time, which allow for in-depth analyses of the  
16 social determinants of health.  
17
  - 18 - Linkages at the individual level between child development data and health and/or education  
19 administrative data in 3 provinces will allow for the exploration of factors contributing to the  
20 association between developmental health outcomes and SES.  
21
  - 22 - Asynchronous data collection cycles in provinces may be a limitation.  
23
  - 24 - Health disorders may be subject to over- or under-reporting which may differ by type of  
25 disorder or place of residence, therefore limiting interpretation.  
26  
27  
28  
29  
30  
31  
32  
33  
34  
35  
36  
37  
38  
39  
40  
41  
42  
43  
44  
45  
46  
47  
48  
49  
50  
51  
52  
53  
54  
55  
56  
57  
58  
59  
60

## INTRODUCTION

### Early Childhood Trajectories

According to UNICEF, healthy development is a right for every child.[1] A *health disorder* i.e., a diagnosable medical condition early in life, has a tremendous impact on the developmental health trajectory of a child. Among otherwise healthy children, approximately one in four kindergartners (27%) lacks the developmental skills to take optimal advantage of school-based education.[2] Among children with identified special health needs at that age, this proportion rises to almost 80%. Having a health disorder in childhood often impacts trajectories of development throughout childhood, adolescence, and adulthood.[3] For instance, poor physical, mental, and socio-emotional development in childhood is linked to later school failure, unemployment, delinquency, and poor health in adulthood.[4, 5] Accordingly, providing additional support to children who are struggling can have protective effects that can set the child on a healthier trajectory,[4] provided we are able to identify those at risk. In environments rich with developmental opportunities and positive experiences, young children can flourish, regardless of their impairment, disease, or health condition.[6] Recent advances in understanding the developmental outcomes for children with health disorders indicate that difficulties are often confined to the areas of disability,[7] and, most importantly, that it is possible to experience a healthy developmental trajectory within a context of a health disorder.[8]

### Children's health and socioeconomic gradients

The constellations of conditions in which children are born and grow are often referred to as *social determinants of health*. [5, 9] Social determinants of health include, among other things, income, social status, education, social support networks, as well as social and physical environments.[9] It has long been recognized that socioeconomic status (SES), usually conceptualized as a combination of income, education, and employment indicators, is strongly related to health, with lower SES associated

1  
2  
3 with both higher mortality and morbidity.[10-13] While not synonymous with social determinants, SES is  
4 one of their strongest correlates.[5] The disparities in health across SES are referred to as the  
5  
6 *socioeconomic gradient*,[10] underscoring that difference in health outcomes is gradual and occurs  
7  
8 across the full spectrum of SES. That is, individuals living in poverty have poorer outcomes when  
9  
10 compared to those at the top of the SES hierarchy, but each increase in income is associated with an  
11  
12 increase in positive outcomes. The gradient in health status across SES has been well described across a  
13  
14 variety of conditions in both adult and child populations.[10, 14-16] Differences in SES at younger ages  
15  
16 are particularly important for setting lifetime health trajectories.[17]  
17  
18  
19  
20  
21

22         There is emerging evidence that low SES can negatively affect the speed of brain development.  
23  
24 [18, 19] In this regard, societal inequities are likely to exert a stronger impact on children with health  
25  
26 disorders than on those growing up without health disorders, henceforth referred to as “typically  
27  
28 developing”. Families of children with health disorders are also more likely to experience socio-  
29  
30 economic disadvantage.[6, 17, 20, 21] Combined with additional social or economic risks (e.g., single  
31  
32 parent family, low income), health disorders can significantly increase a child’s odds for later negative  
33  
34 outcomes.[22-24]  
35  
36  
37

38         SES gradient may affect children with health disorders differently than typically-developing  
39  
40 children.[25-32] Current research on children with health disorders has explored the association of SES  
41  
42 factors with prevalence or with outcomes (such as academic achievement or behaviour), but not both,  
43  
44 and usually for no more than one disorder/diagnosis at a time. This gap has been acknowledged,[33] in  
45  
46 particular in the emerging pediatric literature focusing on children with special health care needs,[34,  
47  
48 35] as it limits comparability, and thus implications for further research and policy. Research in three  
49  
50 Canadian provinces has shown that substantive differences in developmental health among typically-  
51  
52 developing children at school entry are tied to SES.[19, 36-38] Little is known about the underlying  
53  
54  
55  
56  
57  
58  
59  
60

mechanisms of this association at the neighbourhood level,[39] and even less about whether this relationship is similar for children with health disorders.

### Measuring Child Development at the Population Level

Until recently, Canada has lacked nationally representative data pertaining to social indicators of children's developmental health at school entry. Data collection initiatives implemented across most Canadian provinces and territories over the past decade have sought to address this gap, using the Early Development Instrument (EDI) to monitor trends in children's development across jurisdictions. The EDI is a teacher-completed checklist that measures children's developmental health at school entry in kindergarten in five domains: physical health and well-being, social competence, emotional maturity, language and cognitive development, and communication skills and general knowledge. It has been administered at the population level in most Canadian provinces and territories since 2004 (Table 1).[3, 40] EDI data are collected for each child individually and then aggregated at various levels to offer an assessment of developmental vulnerability in a given population. While the main purpose of the EDI is the assessment of child development, the questionnaire includes information on children's special needs, functional difficulties, and as of 2010, diagnoses. Participants with any of these comprise the sample of children with health disorders in the dataset. This approach reflects the non-categorical concept of illness.[41]

Table 1. *Canadian EDI Implementation Schedule from 2003/2004 to 2014/2015 with percentages and number of children with health disorders, as well as number of typically developing children for each implementation.*

|                  | AB                 | BC                   | MB                  | NB              | NL | NT | NS  | ON              | PEI | QC                 | SK                 | Y |
|------------------|--------------------|----------------------|---------------------|-----------------|----|----|-----|-----------------|-----|--------------------|--------------------|---|
| <b>2003/2004</b> |                    |                      |                     |                 |    |    |     | 13%             |     |                    |                    |   |
| <b>2004/2005</b> | 18%<br>434<br>2015 | 13%<br>4622<br>30747 | 13%<br>1080<br>7307 | 9%<br>61<br>617 |    |    |     | 15643<br>103260 |     | 14%<br>230<br>1390 | 14%<br>429<br>2644 |   |
| <b>2005/2006</b> |                    |                      | 18%                 | 16%             |    |    | 15% |                 |     | 14%                | 15%                |   |



|                  |                       |                      |                      |                    |                    |                   |                     |                        |                  |                       |                      |                  |
|------------------|-----------------------|----------------------|----------------------|--------------------|--------------------|-------------------|---------------------|------------------------|------------------|-----------------------|----------------------|------------------|
|                  |                       |                      | 2158<br>9513         | 125<br>659         |                    |                   | 229<br>1291         |                        |                  | 1548<br>9638          | 191<br>1089          |                  |
| <b>2006/2007</b> |                       |                      | 12%<br>1386<br>10128 | 10%<br>39<br>344   |                    |                   |                     |                        |                  | 19%<br>262<br>1132    | 14%<br>219<br>1319   |                  |
| <b>2007/2008</b> | 13%<br>24<br>167      | 13%<br>5016<br>32197 | 13%<br>179<br>1239   |                    | 11%<br>37<br>303   |                   | 17%<br>77<br>379    | 10%<br>11997<br>103955 | 8%<br>88<br>1002 | 20%<br>176<br>700     | 16%<br>254<br>1326   |                  |
| <b>2008/2009</b> |                       |                      | 12%<br>1368<br>10148 | 12%<br>849<br>6147 |                    |                   | 13%<br>605<br>4222  |                        |                  | 15%<br>369<br>2150    |                      |                  |
| <b>2009/2010</b> |                       | 19%<br>8942<br>37301 |                      |                    |                    |                   | 20%<br>147<br>599   |                        |                  |                       | 19%<br>4139<br>18181 | 26%<br>86<br>250 |
| <b>2010/2011</b> | 20%<br>14701<br>57980 |                      | 17%<br>2006<br>9813  |                    | 14%<br>156<br>932  |                   | 20%<br>460<br>1835  | 16%<br>19641<br>105102 |                  |                       |                      | 26%<br>90<br>250 |
| <b>2011/2012</b> |                       | 20%<br>8228<br>33805 |                      |                    | 16%<br>329<br>1760 | 24%<br>141<br>440 | 20%<br>448<br>1749  |                        |                  | 20%<br>12747<br>52242 | 16%<br>87<br>451     | 25%<br>89<br>273 |
| <b>2012/2013</b> |                       |                      | 16%<br>2071<br>10802 |                    | 14%<br>699<br>4134 | 23%<br>138<br>468 | 19%<br>1590<br>6804 |                        |                  |                       | 19%<br>1474<br>6469  | 24%<br>95<br>304 |
| <b>2013/2014</b> |                       | 17%<br>222<br>1055   |                      |                    | 16%<br>823<br>4237 | 23%<br>140<br>465 | 23%<br>314<br>1061  |                        |                  |                       |                      |                  |
| <b>2014/2015</b> |                       |                      | 16%<br>2106<br>11090 |                    |                    | 26%<br>153<br>442 | 19%<br>1582<br>6922 | 17%<br>22319<br>110400 |                  |                       |                      |                  |

Note. Light blue cells indicate a partial provincial collection. Dark blue cells indicate a full provincial collection; if the dark blue box spans multiple years it means a province or territory completed the implementation in waves.

A population-level database of developmental outcomes in kindergarten (as measured by the EDI) has recently been created in a CIHR-funded project, referred to as the *Canadian Neighbourhoods and Early Childhood Development (CanNECD) Study*.<sup>[42]</sup> The aim of the CanNECD Study was to establish a pan-Canadian database for monitoring children's developmental health and well-being.<sup>[35]</sup> This database merged pan-Canadian EDI data from 2004 to 2015, spanning 12 of the 13 Canadian provinces and territories, with the Canadian 2005 and 2010 Taxfiler data, as well as 2006 Census and 2011 National Household Survey data using children's postal codes.

1  
2  
3 The primary goal of the current study, named the Canadian Children's Health in Context Study  
4 (CCHICS), is to investigate the impact of different health disorders diagnosed prior to kindergarten and  
5 socioeconomic disadvantage on children's developmental outcomes at school entry. Analysis of these  
6 data will provide an opportunity to interpret and disseminate findings on developmental outcomes and  
7 socioeconomic gradients at regional and provincial levels for children with different health disorders.  
8  
9 CCHICS aims to establish the prevalence of health disorders and explore the social determinants of  
10 developmental outcomes for children with health disorders. CCHICS is guided by the following research  
11 questions:  
12  
13

14  
15  
16  
17  
18  
19  
20  
21 1) For children diagnosed with health disorders, how do their developmental health outcomes,  
22 measured with the EDI in kindergarten, differ from those of typically-developing children, and do they  
23 vary depending on the type of disorder?  
24  
25

26  
27  
28 2) What is the association between prevalence rates of various health disorders in kindergarten and  
29 neighbourhood-level SES? Does this association vary across jurisdictions (e.g., provinces, health  
30 regions)?  
31  
32

33  
34  
35 3) What is the association between developmental outcomes as measured by the EDI and SES for  
36 children with health disorders? Is it the same as for children without health disorders?  
37  
38

39  
40 4) In three provinces with the capacity to link EDI to administrative health and education data at the  
41 individual level (Manitoba, British Columbia (BC), Ontario), what are the factors contributing to the  
42 association between EDI outcomes and SES?  
43  
44  
45

## 46 47 **METHODS AND ANALYSIS**

### 48 49 **Data sources and variables**

50  
51  
52  
53  
54  
55  
56  
57  
58  
59  
60  
61  
62  
63  
64  
65  
66  
67  
68  
69  
70  
71  
72  
73  
74  
75  
76  
77  
78  
79  
80  
81  
82  
83  
84  
85  
86  
87  
88  
89  
90  
91  
92  
93  
94  
95  
96  
97  
98  
99  
100  
101  
102  
103  
104  
105  
106  
107  
108  
109  
110  
111  
112  
113  
114  
115  
116  
117  
118  
119  
120  
121  
122  
123  
124  
125  
126  
127  
128  
129  
130  
131  
132  
133  
134  
135  
136  
137  
138  
139  
140  
141  
142  
143  
144  
145  
146  
147  
148  
149  
150  
151  
152  
153  
154  
155  
156  
157  
158  
159  
160  
161  
162  
163  
164  
165  
166  
167  
168  
169  
170  
171  
172  
173  
174  
175  
176  
177  
178  
179  
180  
181  
182  
183  
184  
185  
186  
187  
188  
189  
190  
191  
192  
193  
194  
195  
196  
197  
198  
199  
200  
201  
202  
203  
204  
205  
206  
207  
208  
209  
210  
211  
212  
213  
214  
215  
216  
217  
218  
219  
220  
221  
222  
223  
224  
225  
226  
227  
228  
229  
230  
231  
232  
233  
234  
235  
236  
237  
238  
239  
240  
241  
242  
243  
244  
245  
246  
247  
248  
249  
250  
251  
252  
253  
254  
255  
256  
257  
258  
259  
260  
261  
262  
263  
264  
265  
266  
267  
268  
269  
270  
271  
272  
273  
274  
275  
276  
277  
278  
279  
280  
281  
282  
283  
284  
285  
286  
287  
288  
289  
290  
291  
292  
293  
294  
295  
296  
297  
298  
299  
300  
301  
302  
303  
304  
305  
306  
307  
308  
309  
310  
311  
312  
313  
314  
315  
316  
317  
318  
319  
320  
321  
322  
323  
324  
325  
326  
327  
328  
329  
330  
331  
332  
333  
334  
335  
336  
337  
338  
339  
340  
341  
342  
343  
344  
345  
346  
347  
348  
349  
350  
351  
352  
353  
354  
355  
356  
357  
358  
359  
360  
361  
362  
363  
364  
365  
366  
367  
368  
369  
370  
371  
372  
373  
374  
375  
376  
377  
378  
379  
380  
381  
382  
383  
384  
385  
386  
387  
388  
389  
390  
391  
392  
393  
394  
395  
396  
397  
398  
399  
400  
401  
402  
403  
404  
405  
406  
407  
408  
409  
410  
411  
412  
413  
414  
415  
416  
417  
418  
419  
420  
421  
422  
423  
424  
425  
426  
427  
428  
429  
430  
431  
432  
433  
434  
435  
436  
437  
438  
439  
440  
441  
442  
443  
444  
445  
446  
447  
448  
449  
450  
451  
452  
453  
454  
455  
456  
457  
458  
459  
460  
461  
462  
463  
464  
465  
466  
467  
468  
469  
470  
471  
472  
473  
474  
475  
476  
477  
478  
479  
480  
481  
482  
483  
484  
485  
486  
487  
488  
489  
490  
491  
492  
493  
494  
495  
496  
497  
498  
499  
500  
501  
502  
503  
504  
505  
506  
507  
508  
509  
510  
511  
512  
513  
514  
515  
516  
517  
518  
519  
520  
521  
522  
523  
524  
525  
526  
527  
528  
529  
530  
531  
532  
533  
534  
535  
536  
537  
538  
539  
540  
541  
542  
543  
544  
545  
546  
547  
548  
549  
550  
551  
552  
553  
554  
555  
556  
557  
558  
559  
560  
561  
562  
563  
564  
565  
566  
567  
568  
569  
570  
571  
572  
573  
574  
575  
576  
577  
578  
579  
580  
581  
582  
583  
584  
585  
586  
587  
588  
589  
590  
591  
592  
593  
594  
595  
596  
597  
598  
599  
600  
601  
602  
603  
604  
605  
606  
607  
608  
609  
610  
611  
612  
613  
614  
615  
616  
617  
618  
619  
620  
621  
622  
623  
624  
625  
626  
627  
628  
629  
630  
631  
632  
633  
634  
635  
636  
637  
638  
639  
640  
641  
642  
643  
644  
645  
646  
647  
648  
649  
650  
651  
652  
653  
654  
655  
656  
657  
658  
659  
660  
661  
662  
663  
664  
665  
666  
667  
668  
669  
670  
671  
672  
673  
674  
675  
676  
677  
678  
679  
680  
681  
682  
683  
684  
685  
686  
687  
688  
689  
690  
691  
692  
693  
694  
695  
696  
697  
698  
699  
700  
701  
702  
703  
704  
705  
706  
707  
708  
709  
710  
711  
712  
713  
714  
715  
716  
717  
718  
719  
720  
721  
722  
723  
724  
725  
726  
727  
728  
729  
730  
731  
732  
733  
734  
735  
736  
737  
738  
739  
740  
741  
742  
743  
744  
745  
746  
747  
748  
749  
750  
751  
752  
753  
754  
755  
756  
757  
758  
759  
760  
761  
762  
763  
764  
765  
766  
767  
768  
769  
770  
771  
772  
773  
774  
775  
776  
777  
778  
779  
780  
781  
782  
783  
784  
785  
786  
787  
788  
789  
790  
791  
792  
793  
794  
795  
796  
797  
798  
799  
800  
801  
802  
803  
804  
805  
806  
807  
808  
809  
810  
811  
812  
813  
814  
815  
816  
817  
818  
819  
820  
821  
822  
823  
824  
825  
826  
827  
828  
829  
830  
831  
832  
833  
834  
835  
836  
837  
838  
839  
840  
841  
842  
843  
844  
845  
846  
847  
848  
849  
850  
851  
852  
853  
854  
855  
856  
857  
858  
859  
860  
861  
862  
863  
864  
865  
866  
867  
868  
869  
870  
871  
872  
873  
874  
875  
876  
877  
878  
879  
880  
881  
882  
883  
884  
885  
886  
887  
888  
889  
890  
891  
892  
893  
894  
895  
896  
897  
898  
899  
900  
901  
902  
903  
904  
905  
906  
907  
908  
909  
910  
911  
912  
913  
914  
915  
916  
917  
918  
919  
920  
921  
922  
923  
924  
925  
926  
927  
928  
929  
930  
931  
932  
933  
934  
935  
936  
937  
938  
939  
940  
941  
942  
943  
944  
945  
946  
947  
948  
949  
950  
951  
952  
953  
954  
955  
956  
957  
958  
959  
960  
961  
962  
963  
964  
965  
966  
967  
968  
969  
970  
971  
972  
973  
974  
975  
976  
977  
978  
979  
980  
981  
982  
983  
984  
985  
986  
987  
988  
989  
990  
991  
992  
993  
994  
995  
996  
997  
998  
999  
1000

The EDI is a measure of developmental health of kindergarten-age children, implemented at population levels in most jurisdictions in Canada.[3] It is a 103-item, teacher-completed survey of five domains of children's development: physical health and well-being; social competence; emotional maturity; language and cognitive development; and communication skills and general knowledge, further broken down into 16 subdomains (Table 2). Variables relevant to the research objectives are: age, sex, special needs status, functional impairments, a specific diagnosis, if any, and the mean scores for each (sub)domain. After receiving training, kindergarten teachers complete the EDI in the second half of the school year. The psychometric properties of the EDI have been extensively validated.[3, 43-45] The EDI is a reliable and cost-efficient method of assessing developmental health outcomes at the developmentally critical period of transition to school and has moderate to high predictive validity for later school achievement.[46, 47] The EDI is completed for each individual student and the results are aggregated to a group level (according to geographic or demographic criteria) for interpretation. The most common aggregations are at the neighbourhood, school district, and province/territory levels. The Offord Centre for Child Studies (OCCS), at McMaster University, is the national repository of the anonymized EDI data.

Table 2. *Domains and subdomains of the EDI*

| <b>Domains</b>                 | <b>Subdomains</b>                                                                                                         |
|--------------------------------|---------------------------------------------------------------------------------------------------------------------------|
| Physical health and well-being | Physical readiness for the school day<br>Physical independence<br>Gross and fine motor skills                             |
| Social competence              | Overall social competence<br>Responsibility and respect<br>Approaches to learning<br>Readiness to explore new things      |
| Emotional maturity             | Prosocial and helping behaviour<br>Anxious and fearful behaviour<br>Aggressive behaviour<br>Hyperactivity and inattention |

|                                            |                                                                                                   |
|--------------------------------------------|---------------------------------------------------------------------------------------------------|
| Language and cognitive development         | Basic literacy<br>Interest in literacy/numeracy and memory<br>Advanced literacy<br>Basic numeracy |
| Communication skills and general knowledge | Communication skills and general knowledge                                                        |

*Derived measures. Health disorders.* On the EDI, teachers report up to three diagnosed health conditions or impairments, based on information from a parent or health professional (Table 3). The first diagnosis listed is considered the “primary” one for statistical purposes. Teachers report on whether a child has a limitation that interferes with their ability to function in the classroom, with 11 categories provided (Table 4), and whether or not he/she has a special need. *Developmental health.* Mean scores for each of the five EDI domains, and for the 16 EDI subdomains will be used. Vulnerability on each domain, i.e., a score below the 10th percentile based on the population sample of over 160,000 Canadian kindergarten children, will also be used, in addition to *overall vulnerability* (0 = not vulnerable, 1 = vulnerable), which represents vulnerability in at least one of the five domains.[48] For each aggregate unit of analysis (e.g., neighbourhood, school district), child-level data are aggregated to represent the “percentage of vulnerable children” overall, and in a domain, for the given unit of analysis.

Table 3. *Diagnoses included on the EDI.*

| DIAGNOSIS                                                                                                                                 | CODE |
|-------------------------------------------------------------------------------------------------------------------------------------------|------|
| <b><i>Mental Health</i></b>                                                                                                               |      |
| ADHD                                                                                                                                      | 1    |
| Anxiety                                                                                                                                   | 2    |
| Depression                                                                                                                                | 3    |
| Oppositional Defiant Disorder/Conduct Disorder                                                                                            | 4    |
| Other Mental Health Disorders                                                                                                             | 5    |
| <b><i>Developmental Disabilities</i></b>                                                                                                  |      |
| Autism Spectrum Disorder (ASD – includes Autism, Asperger Syndrome, & Pervasive Developmental Disorder [PDD-NOS] not otherwise specified) | 6    |
| Developmentally Delayed/Global Delay                                                                                                      | 7    |
| Down Syndrome/Other Genetic Developmental Disability                                                                                      | 8    |
| Fetal Alcohol Spectrum Disorder (FASD) or Alcohol-Related Neurodevelopmental Disorder (ARND)                                              | 9    |
| Intellectual Delay (Mild or Moderate)                                                                                                     | 10   |
| Rett’s Disorder, Childhood Disintegrative Disorder [CDD]                                                                                  | 11   |
| Learning disorders (reading, writing, math)                                                                                               | 12   |
| <b><i>Speech and Language Disorders</i></b>                                                                                               |      |

|    |                                       |    |
|----|---------------------------------------|----|
| 1  |                                       |    |
| 2  |                                       |    |
| 3  | Apraxia                               | 13 |
| 4  | Cleft Palate/Lip                      | 14 |
| 5  | Receptive or Expressive Language      | 15 |
| 6  | Selective Mutism                      | 16 |
| 7  | Other Speech & Language Disorders     | 17 |
| 8  | <b>Sensory Disorders</b>              |    |
| 9  | Blind/ Visually Impaired              | 18 |
| 10 | Deaf/Hard of Hearing                  | 19 |
| 11 | Other Sensory                         | 20 |
| 12 | <b>Motor Disorders</b>                |    |
| 13 | Cerebral Palsy                        | 21 |
| 14 | Mitochondrial disease                 | 22 |
| 15 | Muscular Dystrophies                  | 23 |
| 16 | Spina Bifida                          | 24 |
| 17 | Other Motor Impairment                | 25 |
| 18 | <b>Other</b>                          |    |
| 19 | Acquired Brain Injury                 | 26 |
| 20 | Asthma                                | 27 |
| 21 | Cancer/ Leukemia/Brain Tumour         | 28 |
| 22 | Cystic Fibrosis (CF)                  | 29 |
| 23 | Diabetes                              | 30 |
| 24 | Epilepsy/Seizures                     | 31 |
| 25 | Heart Problems/Stroke                 | 32 |
| 26 | Juvenile Rheumatoid Arthritis         | 33 |
| 27 | Obesity                               | 34 |
| 28 | Phenylketonuria (PKU)/Other Metabolic | 35 |
| 29 | Tourette Syndrome                     | 36 |
| 30 | Other, not listed                     | 37 |
| 31 |                                       |    |
| 32 |                                       |    |
| 33 |                                       |    |
| 34 |                                       |    |
| 35 |                                       |    |
| 36 |                                       |    |
| 37 |                                       |    |
| 38 |                                       |    |
| 39 |                                       |    |
| 40 |                                       |    |
| 41 |                                       |    |
| 42 |                                       |    |
| 43 |                                       |    |
| 44 |                                       |    |
| 45 |                                       |    |
| 46 |                                       |    |
| 47 |                                       |    |
| 48 |                                       |    |
| 49 |                                       |    |
| 50 |                                       |    |
| 51 |                                       |    |
| 52 |                                       |    |
| 53 |                                       |    |
| 54 |                                       |    |
| 55 |                                       |    |
| 56 |                                       |    |
| 57 |                                       |    |
| 58 |                                       |    |
| 59 |                                       |    |
| 60 |                                       |    |

Table 4. *Functional impairments included on the EDI.*

|    |                                                                                                   |
|----|---------------------------------------------------------------------------------------------------|
| 36 |                                                                                                   |
| 37 | <b>Does this child have a problem that influences his/her ability to function in a classroom?</b> |
| 38 | a. Physical disability                                                                            |
| 39 | b. Visual impairment                                                                              |
| 40 | c. Hearing impairment                                                                             |
| 41 | d. Speech impairment                                                                              |
| 42 | e. Learning disability                                                                            |
| 43 | f. Emotional problem                                                                              |
| 44 | g. Behavioural problem                                                                            |
| 45 | h. Home environment/problems at home                                                              |
| 46 | i. Chronic medical/health problems                                                                |
| 47 | j. Unaddressed dental needs                                                                       |
| 48 | k. Other                                                                                          |
| 49 |                                                                                                   |
| 50 |                                                                                                   |
| 51 |                                                                                                   |
| 52 |                                                                                                   |
| 53 |                                                                                                   |
| 54 |                                                                                                   |
| 55 |                                                                                                   |
| 56 |                                                                                                   |
| 57 |                                                                                                   |
| 58 |                                                                                                   |
| 59 |                                                                                                   |
| 60 |                                                                                                   |

1  
2  
3 The EDI database contains data for over 990,502 kindergarten children, of whom 155,858  
4  
5 (15.7%) have either an identified special need (yes/no), a functional impairment (out of 11), or a  
6  
7 diagnosis (up to 3 out of a possible 37; see Table 3) of a health disorder. The newly-developed linkage  
8  
9 between EDI and databases containing neighbourhood-level socio-demographic variables offers an  
10  
11 opportunity to investigate the degree of impact of socioeconomic disadvantage on children with health  
12  
13 disorders. Furthermore, the linking of the individual records from the EDI–SES databases with existing  
14  
15 health and educational administrative databases in three out of the 12 jurisdictions will allow us to  
16  
17 replicate and validate, on a subsample, the robustness of the patterns found for population-level data,  
18  
19 by including health diagnoses occurring after kindergarten, treatment and service data, and individual-  
20  
21 level indicators of SES.  
22  
23  
24

#### 25 Neighbourhood-level socio-economic status

26  
27  
28 The measures of neighbourhood-level SES applied in this study are based on the methodology  
29  
30 established for the CanNECD Study.[42] Socio-economic and demographic information will come from  
31  
32 the 2006 Canadian Census and 2011 National Household Survey, as well as the 2005 and 2010 Taxfiler  
33  
34 data. Geographic regions have been established for the CanNECD Study. The criteria and boundaries  
35  
36 maintain existing geographical, social, and neighbourhood boundaries, where possible.[42]  
37  
38  
39

40 The traditional conceptualizations of SES usually rely on indicators of income, education, and  
41  
42 occupation, and these will be used in our models, following the establishment of a new SES index for the  
43  
44 CanNECD study.[49] Building on the methodology in the CanNECD Study,[42] additional SES and  
45  
46 demographic indicators will be used in the analyses, including measures of wealth, poverty, lone  
47  
48 parenthood, unemployment, residential dwelling/type of housing, residential stability, occupation,  
49  
50 education, immigration, and language diversity.  
51  
52  
53

#### 54 Individual-level health/education data linkages

1  
2  
3 For three provinces, provincial EDI datasets will be linked with other population-wide databases  
4  
5 at the individual level. Different combinations of data sources (e.g. health, education) will be used to  
6  
7 cross-validate different health disorders in childhood (i.e. examine the concordance of diagnosis from  
8  
9 EDI and administrative datasets) and to examine children's developmental trajectories after  
10  
11 kindergarten.[50, 51] 1) Manitoba: The Manitoba Centre for Health Policy (MCHP) houses the  
12  
13 Population Research Data Repository, a collection of de-identified administrative, survey, clinical, and  
14  
15 registry databases for the entire province. 2) British Columbia: Population Data BC (PopDataBC) houses  
16  
17 provincial administrative databases from the Ministries that hold data relevant to this study (Health and  
18  
19 Education); and 3) Ontario: The Education and Accountability Office (EQAO) database contains standard  
20  
21 grade tests and children's special education needs, and the Institute for Clinical and Evaluative Science  
22  
23 (ICES) data holdings include information on variables similar to Manitoba and BC. These data will be  
24  
25 linked with individual-level EDI data.  
26  
27  
28  
29

### 30 **Patient and public involvement**

31  
32  
33 The project's methodology is based on a secondary data analysis, therefore we did not involve  
34  
35 patients or the public in the development of the research questions. Notwithstanding, considering the  
36  
37 relevance of the study to public health, policy-makers and advisors are members of our team.  
38  
39

### 40 **Data access and security**

41  
42  
43 The CCHICS database will be hosted on a secure network at the OCCS at McMaster University in  
44  
45 Hamilton, Ontario, Canada. A secure platform is a crucial tool for creating accessibility to the database  
46  
47 by other interested researchers and thus increasing the opportunities for future linkages and knowledge  
48  
49 mobilization. We are committed to expand the utilization of the databases we create, therefore,  
50  
51 researchers wishing to gain access to the CCHICS database are invited to submit a short application  
52  
53 outlining the researcher's background and providing a brief description of the proposed project. Upon  
54  
55  
56  
57

1  
2  
3 approval, the anonymized, neighbourhood-aggregated dataset can be downloaded from a secure server  
4  
5 at the OCCS.  
6  
7

8           The individual-level linkages in Manitoba will occur at MCHP and analyses will be conducted by  
9  
10 one of their analysts. CCHICS researchers will only receive results and will not have access to the linked  
11  
12 data. As for the linkages in BC and Ontario, the various establishments will link and de-identify the data  
13  
14 before providing access to the local CCHICS investigators.  
15  
16

### 17 18 **Analysis plan**

19  
20           The planned analyses are designed to address each of the research questions outlined above.  
21  
22 The statistical analyses will take place once the databases have been prepared (EDI/SES) or access  
23  
24 approved (individual-level databases). Building on the methods developed for the CanNECD Study, we  
25  
26 will statistically model the additive and multiplicative associations between the SES and demographic  
27  
28 variables and developmental outcomes for children with health disorders. Results of these analyses will  
29  
30 be particularly valuable for research dissemination and knowledge translation purposes for specific  
31  
32 regions, and within different health disorder subpopulations, as they will allow, for the first time, the  
33  
34 ability to explore SES-related factors that are associated with positive development outcomes for  
35  
36 children with health disorders.  
37  
38  
39  
40

#### 41           *Research Question 1. Developmental outcomes in kindergarten for children with health disorders.*

42  
43 The health information reported on the EDI will be used to create several groups. First, the *typically-*  
44  
45 *developing* reference group will be identified, comprising children without any diagnosed health  
46  
47 disorders, special needs, or functional impairments. Second, the *health disorder* group will be identified  
48  
49 as children with any diagnosed health disorder, special needs, or functional impairments. This group  
50  
51 will be further subdivided into those with specific disorders (e.g. autism spectrum disorder (ASD),  
52  
53 attention deficit hyperactivity disorder (ADHD), cerebral palsy (CP), etc.) and categories of disorders (e.g.  
54  
55  
56  
57  
58  
59  
60



1  
2  
3 mental health, developmental delay, speech and language, etc.). Where possible with administrative  
4 databases, the conditions will be categorized using the International Statistical Classification of Diseases  
5 and Related Health Problems 10<sup>th</sup> Revision (ICD-10).  
6  
7  
8  
9

10 The analyses will focus on EDI scores at the domain- and subdomain-level as outcomes.  
11  
12 Diagnostic subgroups of children with specific disorders (e.g. ASD, ADHD, CP, etc.) will be compared with  
13 the reference group and then with each of the other groups (i.e. ASD compared to ADHD, and so forth).  
14  
15 We will also compare children with only a diagnosis to those with a diagnosis and either a second  
16 diagnosis, a special needs designation, teacher-reported functional concerns, or all of the above.  
17  
18  
19  
20  
21

22 *Research Question 2. Association of the prevalence of health disorders and SES.* Our analyses aim  
23 to identify the combinations of SES factors that are most strongly associated with the prevalence of  
24 health disorders for: 1) the pan-Canadian context, 2) different regions (i.e. provincial, health regions,  
25 neighbourhoods), and 3) with various subpopulations and health groups (e.g. boys compared to girls,  
26 ASD vs other developmental disorders, single vs. co-morbid disorders, etc.). The association between  
27 the identified SES factors and prevalence (overall prevalence and prevalence of specific disorders) will  
28 be tested for main and interaction effects, after controlling for the child-level variables (gender, age,  
29 English-as-a-Second-Language) available from the EDI. The first model to be tested will be that of the  
30 selected SES variables and the prevalence of health disorders. Next, the multiplicative associations of  
31 the SES variables will be added to the model. Finally, child-level variables and geographic-unit variables  
32 will be added to the model as covariates at the different levels of clustering. These analyses will be  
33 performed for each province/territory in the study.  
34  
35  
36  
37  
38  
39  
40  
41  
42  
43  
44  
45  
46  
47  
48  
49

50 *Research Question 3. Child developmental outcomes and SES indices.* We will statistically model  
51 associations between the SES composite indicators and developmental health outcomes using EDI  
52 vulnerability rates for each of the five domains, as well as overall vulnerability rates, for children with  
53  
54  
55  
56  
57

1  
2  
3 health disorders in order to replicate the findings for typically developing children. The relationship  
4 between the SES index variables identified in the CanNECD Study and the EDI mean scores for children  
5 with health disorders will also be examined,[42] and the most strongly correlated neighbourhood-level  
6 SES index variables will be used as neighbourhood-level covariates. The relationship between the SES  
7 variables and each of the outcomes will be tested for main and interaction effects. These analyses will  
8 be repeated for each jurisdiction and each disorder with an adequate sample size.  
9

10  
11  
12  
13  
14  
15  
16 *Research Question 4. Case study provinces: Impact of timing of diagnosis and presence of*  
17 *comorbidities on the association between outcomes and SES.* For three provinces (BC, Manitoba, and  
18 Ontario), children's EDI data will be linked at an individual-level with administrative health and  
19 education databases which include diagnostic information and age-of-onset of first diagnosis. These  
20 data will be used to search for unique behaviour functioning characteristics, measured by the EDI,  
21 among children who were, for the respective disorders, first diagnosed at a relatively younger or older  
22 age, and those with co-morbidities (i.e., for children with more than one disorder). The availability of  
23 individual-level measures of poverty in BC and Manitoba will also allow us to determine whether the  
24 patterns observed using area-level measures of SES are replicated at the individual level.[37] As with  
25 Research Question 3, we will statistically test the main and interaction effects between SES factors and  
26 EDI overall vulnerability rates, including the interaction between SES and age of diagnosis, and  
27 (separately) the interaction between SES and the existence of co-morbidities.  
28  
29  
30  
31  
32  
33  
34  
35  
36  
37  
38  
39  
40  
41  
42  
43

#### 44 **Ethics and dissemination**

45  
46  
47 CCHICS has been approved by the Hamilton Integrated Research Ethics Board (HiREB) and the  
48 University of Manitoba Health Research Ethics Board. Participant confidentiality is protected as the EDI,  
49 Census, and Taxfiler data for this study are aggregated to the neighbourhood level and hosted in a  
50 secure database system.  
51  
52  
53  
54  
55  
56  
57

1  
2  
3 The team of investigators maximizes the relevance of the findings to different communities of  
4 practice (academic, clinical, education, and policy) and the reach to diverse health-oriented groups.  
5  
6 Currently, results from each EDI implementation are disseminated to participating communities and  
7  
8 school districts and have been incorporated by governments and agencies as an indicator of children's  
9  
10 health and well-being.[52, 53] We have a large network of collaborators from other universities and  
11  
12 jurisdictions, whose interests intersect with our program and may, at an appropriate time, join the team  
13  
14 of investigators. Relationships are already well established with many study stakeholders (e.g., clinicians  
15  
16 and educators) through various relationships of the investigators. This will facilitate mobilization of the  
17  
18 knowledge generated through this research and translate it to various audiences (e.g., clinicians,  
19  
20 educators, policy-makers, researchers, community groups, and parents) through four major  
21  
22 mechanisms: practitioner/community networks, education and knowledge dissemination networks,  
23  
24 policy-makers, and data accessibility.  
25  
26  
27  
28  
29

### 30 **DISCUSSION**

31  
32  
33 Few data sources provide the opportunity to researchers to examine the combined association  
34  
35 between early childhood health disorder and socioeconomic in relation to children's early  
36  
37 developmental outcomes. CCHICS is a novel approach to do so at a pan-Canadian population level. As  
38  
39 such, it will generate new knowledge, which will contribute to the science of child development, and will  
40  
41 be of immediate use and application in community contexts. The sociodemographic neighbourhood  
42  
43 factors associated with the prevalence of particular disorders that we expect to find will support public  
44  
45 health community efforts to improve access and integration of early identification services in  
46  
47 neighbourhoods. The integrated knowledge base resulting from this project will establish: 1) a  
48  
49 population-based prevalence of health disorders by jurisdiction, thus allowing future monitoring of  
50  
51 health and developmental trajectories of children with these disorders; 2) the extent to which  
52  
53 socioeconomic disadvantage affects developmental outcomes for children with health disorders; 3) the  
54  
55  
56  
57  
58  
59  
60

1  
2  
3 degree of impact of SES on child development for different types of health disorders; and 4) the factors  
4 that contribute to the mechanism of association between SES and development that can contribute to  
5 our understanding of interventions and supports for children with health disorders.  
6  
7  
8

9  
10 In this study our goal is to identify SES and social factors, if any, that contribute to 'unfair and  
11 unnecessary inequities' in children's developmental health outcomes for those with health disorders.[5]  
12 Identifying these inequities is the first step towards developing strategies to flatten the socioeconomic  
13 gradients.[5] By flattening these gradients, we can improve the overall health status of children, so that  
14 society can move toward the goal of achieving *equity from the start*. Our research will allow us to  
15 compare social gradients across jurisdictions, health disorder subgroups, and groups with associated  
16 functional impairments. Our Pan-Canadian data allow for comparisons that would be otherwise  
17 impossible due to small frequencies of specific health disorders in any given jurisdiction, and if each  
18 province or territory had their own, incommensurable indicator of developmental health outcome.  
19 Moreover, population-level data, and specifically EDI data, have guided action and progress toward  
20 improving early childhood development in Canada and Australia,[54, 55] and have transformed early  
21 childhood systems in parts of the United States.[56] Our methodology and findings will have instant  
22 relevance to research in these countries, as well as others that use EDI data on a regular basis.  
23  
24  
25  
26  
27  
28  
29  
30  
31  
32  
33  
34  
35  
36  
37  
38  
39

40 This approach of examining children with health disorders will also help contribute new  
41 knowledge and make meaningful differences at a policy level, as well as for children in the classroom.  
42 Despite scattered evidence of educational and health sectors adopting policies reflecting the growing  
43 knowledge about actions that will assist in optimizing developmental outcomes (e.g., introduction of  
44 full-day learning in Ontario and BC, enhanced billing codes for the 18-month well-baby visit in Ontario),  
45 provincial policy innovation is inconsistent across Canada, and there is no federal policy framework for  
46 the early years. The results of our study, with their direct relevance to early identification and detection  
47  
48  
49  
50  
51  
52  
53  
54  
55  
56  
57  
58  
59  
60

1  
2  
3 policies, both in the health and education sectors, have a high potential for a direct impact on policies  
4  
5 supporting optimal development for children with health disorders.  
6  
7

## 8 **Limitations**

9

10  
11 Despite many advantages (such as geographic breadth and sample size), our study has  
12  
13 limitations. With the exception of the administrative databases in Manitoba, BC, and Ontario, the  
14  
15 diagnostic information is based on parent information, not on administrative diagnostic codes. Health  
16  
17 disorders may be subject to over- or under-reporting which may differ by type of disorder or even place  
18  
19 of residence. These limitations will be addressed by exploring concordance between EDI and health  
20  
21 databases in Manitoba, BC, and Ontario. However, until data are available to researchers in the  
22  
23 remaining provinces, these limitations cannot be easily overcome in population-based studies. Another  
24  
25 potential limitation is the small number of cases of certain disorders which may limit the analyses  
26  
27 possible by the SES indicators, and by the five EDI domains and 16 sub-domains; aggregation of  
28  
29 measures may be necessary in these cases. In addition, our definition of 'primary' diagnosis as the first  
30  
31 listed disorder is somewhat arbitrary and may require additional sensitivity analyses. Finally, it is  
32  
33 important to note that while this study uses the neighbourhood-level SES to examine the impact of  
34  
35 sociodemographic factors on child development, it does not commit the ecological fallacy as it does not  
36  
37 make inferences about the individual children's SES based on neighbourhood SES.  
38  
39  
40  
41

## 42 **Conclusion**

43

44  
45 CCHICS offers an important opportunity to investigate developmental outcomes in children at  
46  
47 risk that are not commonly included or available in sufficient numbers in sample-based research on  
48  
49 children with health problems. This study also provides a unique and timely opportunity to utilize  
50  
51 existing resources and methods to monitor the prevalence of health disorders at a population level.  
52  
53  
54 Establishing the pattern of the SES gradient is needed for designing early interventions, for policy-level  
55  
56  
57  
58  
59  
60

1  
2  
3 decision-making regarding the type and location of services, and for understanding the necessary  
4  
5 conditions for optimal developmental trajectories of children with health disorders.  
6  
7  
8  
9

10  
11 **Authors' Contributions:** MJ and MB conceived the study. MJ, MB, TB, CB, RC, ED, MAF, BF, SG, JWG,  
12  
13 MG, JLM, HM, JP, RS contributed to the study design and planning. CRW prepared the first draft of the  
14  
15 manuscript with MJ reviewing and amending early draft versions; MJ & CRW finalised the manuscript.  
16  
17 BF, MG, & ED provided statistical expertise guiding the analytic plan. MJ, MB, BF, ED & MG developed  
18  
19 the neighbourhood SES index. All authors (MJ, MB, CRW, TB, CB, RC, ED, MAF, BF, SG, JWG, MG, JLM,  
20  
21 HM, JP, RS) edited and contributed to the final version of the manuscript and gave final approval to the  
22  
23 submitted version. All authors (MJ, MB, CRW, TB, CB, RC, ED, MAF, BF, SG, JWG, MG, JLM, HM, JP, RS)  
24  
25 will participate in the interpretation of findings and the drafting of manuscripts.  
26  
27  
28  
29

30 **Funding statement:** This work was supported by an operating grant from the Canadian Institutes of  
31  
32 Health Research, grant number 142416. Dr. Janus is supported by the Ontario Chair in Early Childhood  
33  
34 Development. Dr. Bennett is supported by a Hamilton Health Sciences Early Career Award. Dr. Ferro is  
35  
36 supported by a hold the Canada Research Chair in Youth Mental Health.  
37  
38

39 **Competing interests statement:** The authors do not have any competing interests.  
40  
41

42 **Acknowledgements:** We would like to thank all the teachers for their diligence and enthusiasm in  
43  
44 completing the EDI questionnaires, and Sarah Taylor and Molly Pottruff for their assistance with the  
45  
46 protocol paper.  
47  
48  
49  
50  
51  
52  
53  
54  
55  
56  
57

## References

1. UNICEF, *Convention on the Rights of Children*. 1989.
2. Offord Centre for Child Studies, *Summary Report: Senior Kindergarten Students in the province of Ontario*. 2017, McMaster University: Hamilton, Ontario.
3. Janus, M. and D.R. Offord, *Development and psychometric properties of the Early Development Instrument (EDI): A measure of children's school readiness*. Canadian Journal of Behavioural Science / Revue canadienne des sciences du comportement, 2007. **39**(1): p. 1-22.
4. Currie, J., *Health Disparities and Gaps in School Readiness*. The Future of Children, 2005. **15**(1): p. 117-38.
5. Commission on Social Determinants of Health, *Closing the gap in a generation: health equity through action on the social determinants of health. Final Report of the Commission on Social Determinants of Health*. 2008, World Health Organization: Geneva, Switzerland.
6. Fawcett, G. and P. Roberts, *Young children with disabilities in Canada*. 2003, Ottawa, ON: Human Resources Development Canada and Health Canada.
7. Janus, M., *Impact of impairment on children with special needs at school entry: Comparison of school readiness outcomes in Canada, Australia, and Mexico*. Exceptionality Education International, 2011. **21**(2-3): p. 29-44.
8. Gorter, J.W., et al., *Pathways toward positive psychosocial outcomes and mental health for youth with disabilities: A knowledge synthesis of developmental trajectories*. Canadian Journal of Community Mental Health, 2014. **33**(1): p. 45-61.
9. Public Health Agency of Canada. *Social Determinants of Health*. 2016 [cited 2018 February 23].
10. Marmot, M.G., et al., *Health inequalities among British civil servants: the Whitehall II study*. Lancet, 1991. **337**(8754): p. 1387-93.

- 1  
2  
3 11. Adler, N.E., et al., *Socioeconomic inequalities in health. No easy solution*. JAMA, 1993. **269**(24):  
4 p. 3140-5.  
5  
6
- 7 12. Marmot, M.G., M. Kogevinas, and M.A. Elston, *Social/economic status and disease*. Annu Rev  
8 Public Health, 1987. **8**: p. 111-35.  
9
- 10 13. Syme, S.L. and L.F. Berkman, *Social class, susceptibility and sickness*. Am J Epidemiol, 1976.  
11  
12 **104**(1): p. 1-8.  
13  
14
- 15 14. Adler, N.E., et al., *Socioeconomic status and health. The challenge of the gradient*. Am Psychol,  
16  
17 1994. **49**(1): p. 15-24.  
18  
19
- 20 15. Hertzman, C., *The biological embedding of early experience and its effects on health in*  
21  
22 *adulthood*. Ann N Y Acad Sci, 1999. **896**: p. 85-95.  
23  
24
- 25 16. Roberts, I. and C. Power, *Does the decline in child injury mortality vary by social class? A*  
26  
27 *comparison of class specific mortality in 1981 and 1991*. BMJ, 1996. **313**(7060): p. 784-6.  
28  
29
- 30 17. Chen, E., A.D. Martin, and K.A. Matthews, *Trajectories of socioeconomic status across children's*  
31  
32 *lifetime predict health*. Pediatrics, 2007. **120**(2): p. e297-303.  
33  
34
- 35 18. Hackman, D.A. and M.J. Farah, *Socioeconomic status and the developing brain*. Trends Cogn Sci,  
36  
37 2009. **13**(2): p. 65-73.  
38
- 39 19. Hanson, J.L., et al., *Family poverty affects the rate of human infant brain growth*. PLoS One,  
40  
41 2013. **8**(12): p. e0080954.  
42
- 43 20. Msall, M.E., et al., *Distressed neighborhoods and child disability rates: analyses of 157,000*  
44  
45 *school-age children*. Dev Med Child Neurol, 2007. **49**(11): p. 814-7.  
46  
47
- 48 21. Janus, M. and E. Duku, *The school entry gap: Socioeconomic, family, and health factors*  
49  
50 *associated with children's school readiness to learn*. Early Education and Development, 2007.  
51  
52 **18**(3): p. 375-403.  
53  
54  
55  
56  
57  
58  
59  
60



- 1  
2  
3 22. Jirikowic, T., D. Kartin, and H.C. Olson, *Children with fetal alcohol spectrum disorders: A*  
4 *descriptive profile of adaptive function*. Canadian Journal of Occupational Therapy / Revue  
5 *Canadienne D'Ergotherapie*, 2008. **75**(4): p. 238-48.  
6  
7
- 8  
9 23. Liptak, G.S., et al., *Health status of children with moderate to severe cerebral palsy*. Dev Med  
10 *Child Neurol*, 2001. **43**(6): p. 364-70.  
11  
12
- 13 24. Streissguth, A.P., et al., *Risk factors for adverse life outcomes in fetal alcohol syndrome and fetal*  
14 *alcohol effects*. J Dev Behav Pediatr, 2004. **25**(4): p. 228-38.  
15  
16
- 17 25. Statistics Canada, *Participation and Activity Limitation Survey 2006: Families of Children with*  
18 *Disabilities in Canada*. 2008, Ministry of Industry: Ottawa, ON.  
19  
20
- 21 26. Kierstead, A.G. and L. Harvey, *Special education in Canada*. Perception, 2001. **25**(2): p. 10-12.  
22  
23
- 24 27. Bethell, C., et al., *Factors promoting or potentially impeding school success: Disparities and state*  
25 *variations for children with special health care needs*. Maternal and Child Health Journal, 2012.  
26  
27  
28 **16**(Suppl 1): p. S35-43.  
29  
30
- 31 28. McManus, B.M., et al., *Social determinants of state variation in special education participation*  
32 *among preschoolers with developmental delays and disabilities*. Health Place, 2011. **17**(2): p.  
33  
34  
35  
36  
37  
38 681-90.
- 39 29. Janus, M., *The Early Development Instrument: A Tool for Monitoring Children's Development and*  
40 *Readiness for School*, in *Early Child Development - From Measurement to Action*, M.E. Young and  
41  
42  
43  
44  
45 L.M. Richardson, Editors. 2007, World Bank: Washington, D.C. p. 141-155.
- 46 30. Cohen, E., et al., *Residential movement patterns of families of young children with chronic*  
47 *conditions in Ontario, Canada: a population-based cohort study*. Int J Equity Health, 2013. **12**: p.  
48  
49  
50  
51 62.
- 52 31. Calman, R.C. and P.J. Crawford, *Starting Early: Teaching Learning and Assessment*. 2013, EQAO  
53  
54  
55  
56  
57  
58  
59  
60 Research: Toronto, ON.

- 1  
2  
3 32. Hillemeier, M.M., et al., *Measuring early childhood health and health disparities: a new*  
4 *approach*. *Matern Child Health J*, 2013. **17**(10): p. 1852-61.  
5  
6  
7 33. Bethell, C.D., et al., *What is the prevalence of children with special health care needs? Toward an*  
8 *understanding of variations in findings and methods across three national surveys*. *Matern Child*  
9 *Health J*, 2008. **12**(1): p. 1-14.  
10  
11  
12 34. Newacheck, P.W., et al., *An epidemiologic profile of children with special health care needs*.  
13 *Pediatrics*, 1998. **102**(1.1): p. 117-23.  
14  
15  
16 35. van Dyck, P.C., et al., *Prevalence and characteristics of children with special health care needs*.  
17 *Arch Pediatr Adolesc Med*, 2004. **158**(9): p. 884-90.  
18  
19  
20 36. Kershaw, P., et al., *The British Columbia atlas of child development*. 2005, Human Learning  
21 *Partnership*: Vancouver, BC.  
22  
23 37. Santos, R., et al., *The Early Development Instrument (EDI) in Manitoba: Linking Socioeconomic*  
24 *Adversity and Biological Vulnerability at Birth to Children's Outcomes at Age 5*. 2012, Manitoba  
25 *Centre for Health Policy*: Winnipeg, MB.  
26  
27  
28 38. Duku, E., et al. *The relationship between both individual and composite socioeconomic indicators*  
29 *and healthy child development in Ontario*. in *Society for Research in Child Development*. 2013.  
30 *Seattle, Washington*.  
31  
32  
33 39. Minh, A., et al., *A review of neighborhood effects and early child development: How, where, and*  
34 *for whom, do neighborhoods matter?* *Health Place*, 2017. **46**: p. 155-174.  
35  
36  
37 40. Janus, M., et al., *The Early Development Instrument: A population-based measure for*  
38 *communities. A handbook on development, properties, and use*. 2007, *Offord Centre for Child*  
39 *Studies*: Hamilton, ON.  
40  
41  
42 41. Jessop, D.J. and R.E.K. Stein, *A Noncategorical Approach to Psychosocial Research*. *Journal of*  
43 *Psychosocial Oncology*, 1993. **1**(4): p. 61-64.  
44  
45  
46  
47  
48  
49  
50  
51  
52  
53  
54  
55  
56  
57  
58  
59  
60

- 1  
2  
3 42. Guhn, M., et al., *Examining the social determinants of children's developmental health: protocol*  
4 *for building a pan-Canadian population-based monitoring system for early childhood*  
5 *development*. BMJ Open, 2016. **6**(4): p. 1-9.  
6  
7  
8  
9  
10 43. Forer, B. and B.D. Zumbo, *Validation of multilevel constructs: Validation methods and empirical*  
11 *findings for the EDI*. Social Indicators Research, 2011. **103**(2): p. 231-265.  
12  
13  
14 44. Guhn, M., A. Gadermann, and B.D. Zumbo, *Does the EDI measure school readiness in the same*  
15 *way across different groups of children?* Early Education and Development, 2007. **18**(3): p. 453-  
16 472.  
17  
18  
19  
20  
21 45. Guhn, M., et al., *Validation theory and research for a population-level measure of children's*  
22 *development, wellbeing, and school readiness*. Social Indicators Research, 2011. **103**(2): p. 183-  
23 191.  
24  
25  
26  
27  
28 46. Forget-Dubois, N., et al., *Predicting early school achievement with the EDI: A longitudinal*  
29 *population-based study*. Early Education and Development, 2007. **18**(3): p. 405-426.  
30  
31  
32 47. Lloyd, J.E.V. and C. Hertzman, *From kindergarten readiness to fourth-grade assessment:*  
33 *Longitudinal analysis with linked population data*. Social Science & Medicine, 2009. **68**(1): p.  
34 111-123.  
35  
36  
37  
38  
39 48. Davies, S., et al., *Using the Early Development Instrument to examine cognitive and non-*  
40 *cognitive school readiness and elementary student achievement*. Early Childhood Research  
41 Quarterly, 2016: p. 63-75.  
42  
43  
44  
45 49. Forer, B., et al., *Canadian Neighbourhoods and Early Child Development (CanNECD) SES Index*. in  
46 preparation.  
47  
48  
49  
50 50. Kozyrskyj, A.L., C.A. Mustard, and A.B. Becker, *Identifying children with persistent asthma from*  
51 *health care administrative records*. Can Respir J, 2004. **11**(2): p. 141-5.  
52  
53  
54  
55  
56  
57  
58  
59  
60

- 1  
2  
3 51. Brownell, M., et al., *Manitoba Child Health Atlas Update*. 2008, Manitoba Centre for Health  
4 Policy: Winnipeg, MB.  
5  
6  
7 52. *Pan-Canadian Health Inequalities Data Tool, 2017 Edition*. A joint initiative of the Public Health  
8 Agency of Canada, the Pan-Canadian Public Health Network, Statistics Canada and the Canadian  
9 Institute of Health Information 2017 [cited 2018 April 13].  
10  
11  
12  
13  
14 53. Canadian Institute for Health Information. *Children Vulnerable in Areas of Early Development*.  
15 2016 [cited 2018 April 13].  
16  
17  
18 54. Janus, M., *Early Development Instrument: "From results to action survey" report*. 2013,  
19 McMaster University, Offord Centre for Child Studies: Hamilton, ON.  
20  
21  
22  
23 55. Sayers, M., et al., *Building better communities for children: Community implementation and*  
24 *evaluation of the Australian Early Development Index*. Early Education and Development, 2007.  
25  
26  
27 **18(3): p. 519-534.**  
28  
29  
30 56. Halfon, N. *Using the EDI for transforming early childhood community systems*. in *First 5*  
31 *California and Water Cooler Joint Conference*. 2011. Sacramento, CA.  
32  
33  
34  
35  
36  
37  
38  
39  
40  
41  
42  
43  
44  
45  
46  
47  
48  
49  
50  
51  
52  
53  
54  
55  
56  
57  
58  
59  
60

**STROBE 2007 (v4) Statement—Checklist of items that should be included in reports of *cross-sectional studies***

**Title of manuscript: Establishing a protocol for building a pan-Canadian population-based monitoring system for early childhood development for children with health disorders - Canadian Children's Health in Context Study (CCHICS)**

| Section/Topic             | Item # | Recommendation                                                                                                                                                                       | Reported on page # |
|---------------------------|--------|--------------------------------------------------------------------------------------------------------------------------------------------------------------------------------------|--------------------|
| <b>Title and abstract</b> | 1      | (a) Indicate the study's design with a commonly used term in the title or the abstract                                                                                               | 1                  |
|                           |        | (b) Provide in the abstract an informative and balanced summary of what was done and what was found                                                                                  | 1                  |
| <b>Introduction</b>       |        |                                                                                                                                                                                      |                    |
| Background/rationale      | 2      | Explain the scientific background and rationale for the investigation being reported                                                                                                 | 3-5                |
| Objectives                | 3      | State specific objectives, including any prespecified hypotheses                                                                                                                     | 7                  |
| <b>Methods</b>            |        |                                                                                                                                                                                      |                    |
| Study design              | 4      | Present key elements of study design early in the paper                                                                                                                              | 1, 11              |
| Setting                   | 5      | Describe the setting, locations, and relevant dates, including periods of recruitment, exposure, follow-up, and data collection                                                      | 1, 6, 7            |
| Participants              | 6      | (a) Give the eligibility criteria, and the sources and methods of selection of participants                                                                                          | 11                 |
| Variables                 | 7      | Clearly define all outcomes, exposures, predictors, potential confounders, and effect modifiers. Give diagnostic criteria, if applicable                                             | 13-15              |
| Data sources/measurement  | 8*     | For each variable of interest, give sources of data and details of methods of assessment (measurement). Describe comparability of assessment methods if there is more than one group | 8-12               |
| Bias                      | 9      | Describe any efforts to address potential sources of bias                                                                                                                            | N/A                |
| Study size                | 10     | Explain how the study size was arrived at                                                                                                                                            | 11                 |
| Quantitative variables    | 11     | Explain how quantitative variables were handled in the analyses. If applicable, describe which groupings were chosen and why                                                         | 13-15              |
| Statistical methods       | 12     | (a) Describe all statistical methods, including those used to control for confounding                                                                                                | 13                 |
|                           |        | (b) Describe any methods used to examine subgroups and interactions                                                                                                                  | 13                 |
|                           |        | (c) Explain how missing data were addressed                                                                                                                                          | N/A                |

|                          |     |                                                                                                                                                                                                              |                    |
|--------------------------|-----|--------------------------------------------------------------------------------------------------------------------------------------------------------------------------------------------------------------|--------------------|
|                          |     | (d) If applicable, describe analytical methods taking account of sampling strategy                                                                                                                           | N/A                |
|                          |     | (e) Describe any sensitivity analyses                                                                                                                                                                        | N/A                |
| <b>Results</b>           |     |                                                                                                                                                                                                              |                    |
| Participants             | 13* | (a) Report numbers of individuals at each stage of study—eg numbers potentially eligible, examined for eligibility, confirmed eligible, included in the study, completing follow-up, and analysed            | N/A                |
|                          |     | (b) Give reasons for non-participation at each stage                                                                                                                                                         | N/A                |
|                          |     | (c) Consider use of a flow diagram                                                                                                                                                                           | N/A                |
| Descriptive data         | 14* | (a) Give characteristics of study participants (eg demographic, clinical, social) and information on exposures and potential confounders                                                                     | N/A                |
|                          |     | (b) Indicate number of participants with missing data for each variable of interest                                                                                                                          | N/A                |
| Outcome data             | 15* | Report numbers of outcome events or summary measures                                                                                                                                                         | N/A                |
| Main results             | 16  | (a) Give unadjusted estimates and, if applicable, confounder-adjusted estimates and their precision (eg, 95% confidence interval). Make clear which confounders were adjusted for and why they were included | N/A                |
|                          |     | (b) Report category boundaries when continuous variables were categorized                                                                                                                                    | N/A                |
|                          |     | (c) If relevant, consider translating estimates of relative risk into absolute risk for a meaningful time period                                                                                             | N/A                |
| Other analyses           | 17  | Report other analyses done—eg analyses of subgroups and interactions, and sensitivity analyses                                                                                                               | N/A                |
| <b>Discussion</b>        |     |                                                                                                                                                                                                              |                    |
| Key results              | 18  | Summarise key results with reference to study objectives                                                                                                                                                     | N/A                |
| Limitations              | 19  | Discuss limitations of the study, taking into account sources of potential bias or imprecision. Discuss both direction and magnitude of any potential bias                                                   | 17, 18             |
| Interpretation           | 20  | Give a cautious overall interpretation of results considering objectives, limitations, multiplicity of analyses, results from similar studies, and other relevant evidence                                   | 16-18              |
| Generalisability         | 21  | Discuss the generalisability (external validity) of the study results                                                                                                                                        | N/A                |
| <b>Other information</b> |     |                                                                                                                                                                                                              |                    |
| Funding                  | 22  | Give the source of funding and the role of the funders for the present study and, if applicable, for the original study on which the present article is based                                                | Cover letter, p. 6 |

\*Give information separately for cases and controls in case-control studies and, if applicable, for exposed and unexposed groups in cohort and cross-sectional studies.

1  
2  
3  
4 **Note:** An Explanation and Elaboration article discusses each checklist item and gives methodological background and published examples of transparent reporting. The STROBE  
5 checklist is best used in conjunction with this article (freely available on the Web sites of PLoS Medicine at <http://www.plosmedicine.org/>, Annals of Internal Medicine at  
6 <http://www.annals.org/>, and Epidemiology at <http://www.epidem.com/>). Information on the STROBE Initiative is available at [www.strobe-statement.org](http://www.strobe-statement.org).  
7  
8  
9  
10  
11  
12  
13  
14  
15  
16  
17  
18  
19  
20  
21  
22  
23  
24  
25  
26  
27  
28  
29  
30  
31  
32  
33  
34  
35  
36  
37  
38  
39  
40  
41  
42  
43  
44  
45  
46  
47

For peer review only
