# Supplementary material for: Establishing a protocol for building a pan-Canadian population-based monitoring system for early childhood development for children with health disorders: Canadian Children’s Health in Context Study (CCHICS)
Source: PubMed Central journal article supplement — BMJ Open. 2018 May 29;8(5):e023688. doi: 10.1136/bmjopen-2018-023688 (PMC5988180; doi:10.1136/bmjopen-2018-023688), 2018-05-29
Supplement: bmjopen-2018-023688.reviewer_comments.pdf [file bmjopen-2018-023688.reviewer_comments.pdf]

## PEER REVIEW HISTORY

BMJ Open publishes all reviews undertaken for accepted manuscripts. Reviewers are asked to complete a checklist review form (<http://bmjopen.bmj.com/site/about/resources/checklist.pdf>) and are provided with free text boxes to elaborate on their assessment. These free text comments are reproduced below.

## ARTICLE DETAILS

|                            |                                                                                                                                                                                                                                                                               |
|----------------------------|-------------------------------------------------------------------------------------------------------------------------------------------------------------------------------------------------------------------------------------------------------------------------------|
| <b>TITLE (PROVISIONAL)</b> | Establishing a protocol for building a pan-Canadian population-based monitoring system for early childhood development for children with health disorders - Canadian Children's Health in Context Study (CCHICS)                                                              |
| <b>AUTHORS</b>             | Janus, Magdalena; Brownell, Marni; Reid-Westoby, Caroline; Bennett, Teresa; Birken, Catherine; Coplan, Robert; Duku, Eric; Ferro, Mark; Forer, Barry; Georgiades, Stelios; Gorter, Jan Willem; Guhn, Martin; Maguire, Jonathan; Manson, Heather; Pei, Jacqueline; Santos, Rob |

This article was not externally reviewed at BMJ Open. Protocols that have been independently assessed prior to submission to BMJ Open are usually fast-tracked to publication on the grounds that further substantial changes will not be possible. This independent assessment will usually be external, independent review for both a substantial grant award from a non-commercial or government funder and ethics approval.
